# Supplementary material for: Inference of the SARS-CoV-2 generation time using UK household data
Source: eLife. 2022 Feb 9;11:e70767. doi: 10.7554/eLife.70767 (PMC8967386; doi:10.7554/eLife.70767)
Supplement: Figure 1—source data 1. — The transmission data from 172 households used in our analyses. [file elife-70767-fig1-data1.xlsx]

## Sheet: data
hoconumber	status	householdsize	swab1	swab2	symptoms	antib	infected	month_case_swab	case_swab_swab1	case_swab_swab2	case_swab_ill
1	CASE	2	0	0	1	1	1	3	11	18	-3
1	CONTACT	2	0	0	1	1	1	3	11	18	-5
2	CASE	4	0	0	1	1	1	3	12	19	-1
2	CONTACT	4	0	0	1	0	0	3	12	19
2	CONTACT	4	0	0	0	1	1	3	12	19
2	CONTACT	4	0	0	1	0	0	3	12	19
3	CASE	2	0	0	1	1	1	3	11	18	-1
3	CONTACT	2	0	0	1	1	1	3	11	18	2
4	CASE	4	0	0	1	1	1	3	12	19	-3
4	CONTACT	4	0	0	1	1	1	3	12	19	-3
4	CONTACT	4	0	0	1	1	1	3	12	19	0
4	CONTACT	4	0	0	1	1	1	3	12	19	-4
5	CASE	2	0	0	1	1	1	3	13	20	-1
5	CONTACT	2	1	0	1	1	1	3	13	20	2
6	CASE	4	0	0	1	1	1	3	13	21	0
6	CONTACT	4	0	0	1	1	1	3	13	21	8
6	CONTACT	4	1	1	1	1	1	3	13	21	0
6	CONTACT	4	1	0	1	1	1	3	13	21	3
7	CASE	2	0	0	1	1	1	4	9	16	-2
7	CONTACT	2	0	0	0	1	1	4	9	16
8	CASE	2	0	0	1	1	1	4	7	14	-2
8	CONTACT	2	1	1	1	1	1	4	7	14	11
9	CASE	2	1	0	1	1	1	4	8	16	-3
9	CONTACT	2	0	0	0	0	0	4	8	16
11	CASE	3	0	0	1	1	1	4	9	16	-3
11	CONTACT	3	0	0	1	0	0	4	9	16
11	CONTACT	3	0	0	1	1	1	4	9	16	5
12	CASE	4	0	0	1	1	1	4	8	15	-5
12	CONTACT	4	0	0	1	0	0	4	8	15
12	CONTACT	4	0	0	1	1	1	4	8	15	-25
12	CONTACT	4	0	0	0	0	0	4	8	15
13	CASE	3	0	0	1	1	1	4	8	15	-3
13	CONTACT	3	0	0	1	1	1	4	8	15	0
13	CONTACT	3	1	0	1	1	1	4	8	15	2
14	CASE	3	0	0	1	1	1	4	7	14	-5
14	CONTACT	3	0	0	1	0	0	4	7	14
14	CONTACT	3	1	0	1	1	1	4	7	14	-4
15	CASE	3	1	1	1	1	1	4	5	12	-4
15	CONTACT	3	0	0	0	0	0	4	5	11
15	CONTACT	3	0	0	0	0	0	4	5	11
16	CASE	2	1	1	1	1	1	4	5	12	-2
16	CONTACT	2	1	0	0	1	1	4	5	12
17	CASE	3	1	0	1	1	1	4	9	17	-6
17	CONTACT	3	0	0	1	1	1	4	11	18	-10
17	CONTACT	3	0	0	1		9	4	11	17
18	CASE	4	0	0	1	1	1	4	7	14	-3
18	CONTACT	4	1	1	1	1	1	4	7	14	-5
18	CONTACT	4	0	1	1	1	1	4	7	14	1
18	CONTACT	4	1	0	1	1	1	4	7	14	1
19	CASE	2	1	0	1	1	1	4	8	15	-9
19	CONTACT	2	1	0	0	1	1	4	8	15
20	CASE	4	1	1	1	1	1	4	5	12	-2
20	CONTACT	4	1	1	0	1	1	4	5	12
20	CONTACT	4	0	0	0	0	0	4	5	12
20	CONTACT	4	0	0	0	0	0	4	5	12
21	CASE	5	0	0	1	1	1	4	6	13	0
21	CONTACT	5	0	0	0	0	0	4	6	13
21	CONTACT	5	0	0	0	0	0	4	6	13
21	CONTACT	5	0	0	0	0	0	4	6	13
21	CONTACT	5	0	0	1	0	0	4	6	13
22	CASE	4	0	0	1	1	1	4	8	15	-5
22	CONTACT	4	0	0	0	0	0	4	8	15
22	CONTACT	4	0	0	0	1	1	4	8	15
22	CONTACT	4	0	0	0	0	0	4	8	15
23	CASE	4	0	0	1	1	1	4	10	18	-2
23	CONTACT	4	0	0	1		9	4	10	18
23	CONTACT	4	0	0	0		9	4	10	18
23	CONTACT	4	0	0	0	0	0	4	10	18
24	CASE	2	0	0	1	1	1	4	9	16	-2
24	CONTACT	2	0	0	1	1	1	4	9	16	9
25	CASE	2	0	0	1	1	1	4	12	19	-4
25	CONTACT	2	0	0	1	1	1	4	12	19	-1
26	CASE	3	0	0	1	1	1	4	10	16	0
26	CONTACT	3	0	0	0	0	0	4	10	16
26	CONTACT	3	0	0	1	1	1	4	9	16	-4
27	CASE	5	0	0	1	1	1	4	10	16	-7
27	CONTACT	5	0	0	1	0	0	4	10	16
27	CONTACT	5	0	0	1	0	0	4	10	16
27	CONTACT	5	0	0	1	0	0	4	10	16
27	CONTACT	5	0	0	1	0	0	4	10	16
28	CASE	4	1	0	1	1	1	4	10	18	-12
28	CONTACT	4	0	0	0	0	0	4	10	18
28	CONTACT	4	0	0	1	1	1	4	10	18	11
28	CONTACT	4	1	0	1	1	1	4	10	18	-7
29	CASE	2	0	0	1	1	1	4	7	14	-5
29	CONTACT	2	0	0	0	0	0	4	7	14
30	CASE	2	0	1	1	1	1	4	9	16	-4
30	CONTACT	2	1	0	1	1	1	4	9	16	-9
31	CASE	2	1	1	1	1	1	4	8	15	-1
31	CONTACT	2	1	1	1	1	1	4	8	15	3
32	CASE	5	0	0	1	1	1	4	14	21	0
32	CONTACT	5	0	0	1	1	1	4	14	21	4
32	CONTACT	5	0	0	1	1	1	4	14	21	3
32	CONTACT	5	1	0	0	1	1	4	14	21
32	CONTACT	5	1	1	0	1	1	4	14	21
33	CASE	4	0	0	1	1	1	4	10	17	-4
33	CONTACT	4	0	0	0	0	0	4	10	17
33	CONTACT	4	0	0	1	0	0	4	10	17
33	CONTACT	4	0	0	1	0	0	4	10	17
34	CASE	5	0		1	1	1	4	15		-6
34	CONTACT	5	0		0	0	0	4	15
34	CONTACT	5	0		0	1	1	4	15
34	CONTACT	5	0		1	1	1	4	15		9
34	CONTACT	5	0		1	1	1	4	15		-9
35	CASE	3	0	0	1	1	1	4	11	18	-3
35	CONTACT	3	0	0	0	0	0	4	11	18
35	CONTACT	3	0	1	1	1	1	4	11	18	-11
36	CASE	2			1		1	4			-5
36	CONTACT	2	0	0	0	0	0	4	7	14
37	CASE	3	0	0	1	1	1	4	12	19	0
37	CONTACT	3	0	0	1	1	1	4	12	19	13
37	CONTACT	3	0	0	1	0	0	4	12	19
38	CASE	2	0		1	1	1	4	7		-3
38	CONTACT	2	1	1	1	1	1	4	7	13	1
39	CASE	4	1	0	1	1	1	4	5	12	-7
39	CONTACT	4	1	1	1	1	1	4	5	12	-4
39	CONTACT	4	1	0	1		1	4	5	12	-3
39	CONTACT	4	0	0	0	0	0	4	5	12
40	CASE	2	0	0	1	1	1	4	5	12	-5
40	CONTACT	2	0	0	0	0	0	4	5	12
41	CASE	4	0	0	1	0	1	4	9	16	-3
41	CONTACT	4	0	0	0	1	1	4	9	16
41	CONTACT	4	0	0	0	0	0	4	9	16
41	CONTACT	4	0	0	0	0	0	4	9	16
42	CASE	2	1	0	1	1	1	4	7	14	-1
42	CONTACT	2	1	0	1	1	1	4	7	14	-1
43	CASE	5	0	0	1	1	1	4	8	14	-9
43	CONTACT	5	0	0	1	0	0	4	8	14
43	CONTACT	5	1	1	1	1	1	4	8	14	1
43	CONTACT	5	1	1	1	1	1	4	8	14	4
43	CONTACT	5	1	1	1	1	1	4	8	14	0
44	CASE	3	0	0	1	1	1	4	6	12	-6
44	CONTACT	3	0	0	0	0	0	4	6	12
44	CONTACT	3	0	0	1	0	0	4	6	12
45	CASE	2	0	0	1	1	1	4	7	14	-6
45	CONTACT	2	0	0	0	0	0	4	7	14
46	CASE	2	1	0	1	1	1	4	4	11	-3
46	CONTACT	2	1	0	1	1	1	4	4	11	6
47	CASE	5	0	0	1	1	1	4	17	24	-5
47	CONTACT	5	0	0	1	1	1	4	17	24	2
47	CONTACT	5	0	0	1	0	0	4	17	24
47	CONTACT	5	1	0	1	1	1	4	17	24	-4
47	CONTACT	5	0	1	1	1	1	4	17	24	-15
48	CASE	2	0	0	1	1	1	4	10	17	-5
48	CONTACT	2	0	0	1		9	4	10	17
49	CASE	3	0	0	1	1	1	4	6	13	-5
49	CONTACT	3	0	0	1	1	1	4	6	13	-9
49	CONTACT	3	0	0	1	1	1	4	6	13	-11
50	CASE	2	0	0	1	1	1	4	5	12	-4
50	CONTACT	2	0	0	1	0	0	4	5	12
51	CASE	2	1	0	1	1	1	4	7	14	-4
51	CONTACT	2	0	0	0	1	1	4	7	14
52	CASE	3	1	0	1	1	1	4	6	13	-9
52	CONTACT	3	0	0	1	1	1	4	6	13	-16
52	CONTACT	3	0	0	1	1	1	4	6	13	-15
53	CASE	4	1	0	1	1	1	5	6	13	-11
53	CONTACT	4	0	0	1	1	1	5	6	13	-37
53	CONTACT	4	0	0	1	1	1	5	6	13	-12
53	CONTACT	4	0	0	1	0	0	5	6	13
54	CASE	2	0	0	1	1	1	5	8	15	-3
54	CONTACT	2	1	1	1	1	1	5	8	15	6
55	CASE	8	1	0	1	1	1	4	13	20	0
55	CONTACT	8	0	0	0	0	0	4	13	20
55	CONTACT	8	1	0	1	1	1	4	13	20	3
55	CONTACT	8	0	0	1	1	1	4	13	20	-6
55	CONTACT	8	0	0	1	1	1	4	13	20	-16
55	CONTACT	8	0	0	1	1	1	4	13	20	-3
55	CONTACT	8	0	0	1	1	1	4	13	20	5
55	CONTACT	8	0	0	0	0	0	4	13	20
56	CASE	6	0	0	1	1	1	6	12	19	-3
56	CONTACT	6	0	0	0	0	0	6	12	19
56	CONTACT	6	1	0	1	1	1	6	12	19	12
56	CONTACT	6	0	0	0	0	0	6	12	19
56	CONTACT	6	0	0	1	1	1	6	12	19	-4
56	CONTACT	6	0	0	1	0	0	6	12	19
58	CASE	4	0	0	1	1	1	6	7	16	-1
58	CONTACT	4	0	0	0	0	0	6	7	16
58	CONTACT	4	0	0	1	0	0	6	7	16
58	CONTACT	4	0	0	0	0	0	6	7	16
59	CASE	4	0	0	1	1	1	6	8	15	-1
59	CONTACT	4	0	0	1	1	1	6	8	15	0
59	CONTACT	4	0	0	0	0	0	6	8	15
59	CONTACT	4	0	0	1	0	0	6	8	15
60	CASE	4	0	0	1	1	1	6	9	20	-8
60	CONTACT	4	0	0	1	1	1	6	9	20	-8
60	CONTACT	4	0	0	0	0	0	6	9	20
60	CONTACT	4	0	0	0	1	1	6	9	19
61	CASE	3	0	0	1	1	1	4	11	18	-6
61	CONTACT	3	0	0	1	1	1	4	11	18	-5
61	CONTACT	3	0	0	1	1	1	4	11	18	1
62	CASE	4	0	0	1	1	1	4	9	16	-2
62	CONTACT	4	0	0	1	1	1	4	9	16	-12
62	CONTACT	4	0	0	1	1	1	4	9	16	-31
62	CONTACT	4	0	0	1	1	1	4	9	16	-9
63	CASE	4	0	0	1	1	1	4	11	18	-2
63	CONTACT	4	0	0	0		9	4	11	17
63	CONTACT	4	0	0	0	0	0	4	11	18
63	CONTACT	4	0	0	0	0	0	4	11	17
64	CASE	3	0	0	1	1	1	4	10	17	-13
64	CONTACT	3	0	0	1	1	1	4	10	17	-14
64	CONTACT	3	0	0	1		9	4	10	17
65	CASE	4	0	0	1	1	1	4	9	16	-8
65	CONTACT	4	0	0	0	0	0	4	9	16
65	CONTACT	4	0	0	1	1	1	4	9	16	-13
65	CONTACT	4	0		1	1	1	4	-4		-17
66	CASE	3	0	0	1	0	1	4	16	23	-2
66	CONTACT	3	0	0	1	0	0	4	16	23
66	CONTACT	3	0	0	1	1	1	4	16	23	3
67	CASE	2	1	0	1	1	1	4	8	15	-8
67	CONTACT	2	0	0	1	1	1	4	8	15	2
68	CASE	2	0	0	1	1	1	4	10	17	-5
68	CONTACT	2	0	0	1	0	0	4	10	17
69	CASE	3	0	0	1	1	1	4	10	17	-3
69	CONTACT	3	0	0	1	1	1	4	10	17	-7
69	CONTACT	3	0	0	0	1	1	4	10	17
70	CASE	5	1	0	1	1	1	4	10	17	-3
70	CONTACT	5	0	0	1	1	1	4	10	17	-6
70	CONTACT	5	0	0	1	0	0	4	10	17
70	CONTACT	5	0	0	0	0	0	4	10	17
70	CONTACT	5	0	0	0	0	0	4	10	17
71	CASE	2	0	0	1	1	1	4	8	15	-4
71	CONTACT	2	0	0	1	0	0	4	8	15
72	CASE	4	0	0	1	1	1	4	11	18	-4
72	CONTACT	4	0	0	1	1	1	4	11	18	-2
72	CONTACT	4	0	0	1	1	1	4	11	18	-3
72	CONTACT	4	0	0	1	1	1	4	11	18	-1
73	CASE	2	0	0	1	1	1	4	10	17	-7
73	CONTACT	2	0	0	0	1	1	4	10	17
74	CASE	5	1	0	1	1	1	4	4	11	-6
74	CONTACT	5	0	0	0	0	0	4	4	11
74	CONTACT	5	0	0	1	0	0	4	4	12
74	CONTACT	5	0	0	1	0	0	4	4	11
74	CONTACT	5	0	0	0	0	0	4	4	11
75	CASE	3	0	0	1	1	1	4	8	15	-6
75	CONTACT	3	0	0	1	0	0	4	8	15
75	CONTACT	3	0	0	0		9	4	8	15
76	CASE	2	0	0	1	1	1	4	9	16	-4
76	CONTACT	2	0	0	1	0	0	4	9	16
77	CASE	6	0	0	1	1	1	4	8	15	-5
77	CONTACT	6	0	0	1	1	1	4	8	15	-9
77	CONTACT	6	1	0	0	1	1	4	8	15
77	CONTACT	6	1	0	0	1	1	4	8	15
77	CONTACT	6	0	0	1	0	0	4	8	15
77	CONTACT	6	0	0	1	1	1	4	8	15	-2
78	CASE	5	0	0	1	1	1	4	9	16	-3
78	CONTACT	5	0	0	1	1	1	4	9	17	-5
78	CONTACT	5	1	0	1	1	1	4	9	16	-4
78	CONTACT	5	0	0	0	1	1	4	9	16
78	CONTACT	5	0	0	1	0	0	4	9	16
79	CASE	5	0	0	1	1	1	4	7	14	-10
79	CONTACT	5	0	0	1	0	0	4	7	14
79	CONTACT	5	0	0	1	0	0	4	7	14
79	CONTACT	5	1	0	1	1	1	4	7	14	-1
79	CONTACT	5	0	0	1	0	0	4	7	14
80	CASE	2	1	1	1	1	1	4	5	12	-3
80	CONTACT	2	0	0	1	0	0	4	5	12
81	CASE	3	1	0	1	1	1	4	15	22	-7
81	CONTACT	3	0	0	1	1	1	4	15	22	-2
81	CONTACT	3	0	0	1	1	1	4	15	22	-2
82	CASE	5	0		1		1	4	11		-7
82	CONTACT	5	0		0		9	4	11
82	CONTACT	5	0		0		9	4	11
82	CONTACT	5	0		0		9	4	11
82	CONTACT	5	0		1		9	4	11
83	CASE	2	0	0	1	1	1	4	7	14	-40
83	CONTACT	2	1	0	1	1	1	4	7	14	-50
84	CASE	2	0	0	1	1	1	4	5	12	-7
84	CONTACT	2	0	0	0		9	4	5	12
85	CASE	3	1	0	1	1	1	4	6	13	-5
85	CONTACT	3	0	0	1	1	1	4	6	13	-7
85	CONTACT	3	0	0	0	0	0	4	6	13
86	CASE	3	1	0	1	1	1	5	6	13	-3
86	CONTACT	3	0	0	0	0	0	5	6	13
86	CONTACT	3	0	0	1	1	1	5	6	13	10
87	CASE	2	0	0	1	1	1	5	8	15	-1
87	CONTACT	2	1	0	1	1	1	5	8	15	2
88	CASE	6	0	0	1	1	1	5	10	17	-4
88	CONTACT	6	1	0	1	1	1	5	10	17	3
88	CONTACT	6	0	0	1	1	1	5	10	17	0
88	CONTACT	6	0	0	0	1	1	5	10	17
88	CONTACT	6	0	0	0	0	0	5	10	17
88	CONTACT	6	0	0	1	1	1	5	10	17	-8
89	CASE	4	0	0	1	1	1	5	6	13	-1
89	CONTACT	4	0	0	0	0	0	5	6	13
89	CONTACT	4	1	0	0	1	1	5	6	13
89	CONTACT	4	0	0	1	1	1	5	6	13	-1
91	CASE	3	1	0	1	1	1	6	6	14	0
91	CONTACT	3	1	0	1	1	1	6	6	14	2
91	CONTACT	3	0	0	1	0	0	6	6	14
92	CASE	4	0		1	1	1	6	10		-2
92	CONTACT	4	0		0	0	0	6	10
92	CONTACT	4	0		0	0	0	6	10
92	CONTACT	4	0		0	0	0	6	10
95	CASE	4	0	0	1	1	1	7	9	16	-1
95	CONTACT	4	0	0	1	0	0	7	9	16
95	CONTACT	4	0	0	0	0	0	7	9	16
95	CONTACT	4	0	0	1	0	0	7	9	16
97	CASE	3	1	0	1	1	1	7	5	12	0
97	CONTACT	3	0	0	1	0	0	7	5	12
97	CONTACT	3	0	0	1	0	0	7	5	12
99	CASE	4	1	0	1	1	1	7	5	12	-2
99	CONTACT	4	0	0	1	0	0	7	5	12
99	CONTACT	4	1	0	1	1	1	7	5	12	3
99	CONTACT	4	0	0	0	0	0	7	5	12
101	CASE	2	0	0	1	1	1	4	5	12	-6
101	CONTACT	2	0	0	1	1	1	4	5	12	-10
102	CASE	2	0	0	1	1	1	4	8	15	-6
102	CONTACT	2	0	0	1	1	1	4	8	15	-12
103	CASE	2	0	0	1	1	1	5	9	17	-5
103	CONTACT	2	1	0	1		1	5	9	17	-7
104	CASE	2	1	1	1	1	1	5	5	12	-5
104	CONTACT	2	0	0	1	0	0	5	5	12
105	CASE	2	1	0	1	1	1	5	7	14	0
105	CONTACT	2	1	0	1	1	1	5	7	14	-6
106	CASE	5	0	0	1	1	1	5	9	17	-5
106	CONTACT	5	0	0	0	0	0	5	9	17
106	CONTACT	5	0	0	1	0	0	5	9	17
106	CONTACT	5	0	0	0	0	0	5	9	17
106	CONTACT	5	0	0	0	0	0	5	9	17
107	CASE	2	1	1	1	1	1	5	6	13	-1
107	CONTACT	2	0	0	0	0	0	5	6	13
109	CASE	4	1	1	1	1	1	5	12	19	-1
109	CONTACT	4	1	0	1	1	1	5	12	19	2
109	CONTACT	4	1	0	1	1	1	5	12	19	4
109	CONTACT	4	0	0	0	0	0	5	12	19
110	CASE	4	0	0	1	1	1	5	13	20	-2
110	CONTACT	4	0	0	1	0	0	5	13	20
110	CONTACT	4	0	0	1	1	1	5	13	20	5
110	CONTACT	4	0	0	0	0	0	5	13	20
111	CASE	3	0	0	1	1	1	6	7	14	-3
111	CONTACT	3	0	0	0		9	6	7	14
111	CONTACT	3	0	0	1	1	1	6	7	14	5
114	CASE	4	0	0	1	1	1	6	8	15	-7
114	CONTACT	4	0		1		9	6	8
114	CONTACT	4	0	0	1	1	1	6	8	15	7
119	CASE	2	0	0	1	1	1	6	7	14	-5
119	CONTACT	2	0	0	1	0	0	6	7	14
121	CASE	4	0	0	1	1	1	6	12	19	-3
121	CONTACT	4	0	0	0	0	0	6	12	19
121	CONTACT	4	0	0	1	1	1	6	12	19	-58
121	CONTACT	4	0	0	1	1	1	6	12	19	-58
122	CASE	5	0	0	1	0	1	6	7	14	-4
122	CONTACT	5	0	0	0	1	1	6	7	14
122	CONTACT	5	0	0	0	0	0	6	7	14
122	CONTACT	5	0	0	1	1	1	6	7	14	-60
122	CONTACT	5	0	0	1	0	0	6	7	14
131	CASE	4	1	0	1		1	6	7	14	-1
131	CONTACT	4	0	0	0	0	0	6	7	14
131	CONTACT	4	0	0	0	0	0	6	7	14
131	CONTACT	4	0	0	0		9	6	7	14
132	CASE	4	0	0	1	1	1	6	10	17	0
132	CONTACT	4	0	0	1	0	0	6	10	17
132	CONTACT	4	0	0	0	0	0	6	10	17
132	CONTACT	4	0	0	0	0	0	6	10	17
133	CASE	5	1	0	1	1	1	6	8	15	0
133	CONTACT	5	0	0	0	0	0	6	8	15
133	CONTACT	5	0	0	1	0	0	6	8	15
133	CONTACT	5	1	1	1	1	1	6	8	15	4
133	CONTACT	5	0	0	0	1	1	6	8	15
138	CASE	4	1	0	1	1	1	6	8	15	-1
138	CONTACT	4	0	0	1	0	0	6	8	15
138	CONTACT	4	0	0	0	0	0	6	8	15
138	CONTACT	4	1	1	1	1	1	6	8	15	6
143	CASE	3			1	1	1	6			-5
143	CONTACT	3	0	0	1	0	0	6	14	20
143	CONTACT	3	0	1	1	1	1	6	14	20	2
146	CASE	3	1	1	1	1	1	7	4	11	1
146	CONTACT	3	0	0	0	0	0	7	4	11
146	CONTACT	3	0	0	0	0	0	7	4	11
150	CASE	5	1	0	1	1	1	7	9	16	-2
150	CONTACT	5	0	0	1	1	1	7	9	16	10
150	CONTACT	5	0	0	0	0	0	7	9	16
150	CONTACT	5	0	0	0	0	0	7	9	16
150	CONTACT	5	0	0	0	0	0	7	9	16
151	CASE	3	0	0	1	1	1	7	12	20	0
151	CONTACT	3	0	0	1	0	0	7	12	20
151	CONTACT	3	0	0	1	0	0	7	12	20
168	CASE	3	0	0	1	1	1	7	8	15	-1
168	CONTACT	3	0	0	1	1	1	7	8	15	7
168	CONTACT	3	0	0	1	1	1	7	8	15	8
169	CASE	5	0		1		1	7	8		-1
169	CONTACT	5	0		0		9	7	8
169	CONTACT	5	0		0	0	0	7	8
169	CONTACT	5	0		0	1	1	7	8
169	CONTACT	5	0		0	0	0	7	8
177	CASE	3	0	0	1	1	1	7	8	15	1
177	CONTACT	3	0	0	1	0	0	7	8	15
177	CONTACT	3	0	0	1	0	0	7	8	15
179	CASE	4	0	0	1	1	1	7	6	13	-1
179	CONTACT	4	0	0	1	0	0	7	6	13
179	CONTACT	4	0	0	1	0	0	7	6	13
179	CONTACT	4	0	0	1	0	0	7	6	13
183	CASE	4	0	0	1		1	7	8	15	-5
183	CONTACT	4	0	0	0	1	1	7	8	15
183	CONTACT	4	0	0	0	0	0	7	8	15
183	CONTACT	4	0	0	0	0	0	7	8	15
184	CASE	5	0	0	1	1	1	7	9	16	-6
184	CONTACT	5	0	0	0	0	0	7	9	16
184	CONTACT	5	0	0	0	0	0	7	9	16
184	CONTACT	5	0	0	1	0	0	7	9	16
185	CASE	4	1	0	1	1	1	8	10	16	-4
185	CONTACT	4	1	1	1	1	1	8	10	16	2
185	CONTACT	4	1	1	1		1	8	10	16	3
185	CONTACT	4	1	1	1	1	1	8	10	16	-1
187	CASE	3	0		1	1	1	8	6		-2
187	CONTACT	3	0		0		9	8	6
187	CONTACT	3	0		1	0	0	8	6
189	CASE	4	1	0	1	1	1	9	4	11	-3
189	CONTACT	4	0	0	1	0	0	9	4	13
189	CONTACT	4	0	0	0	0	0	9	4	11
189	CONTACT	4	0	0	1	0	0	9	4	11
190	CASE	5	1	0	1		1	9	6	13	-5
190	CONTACT	5	0	0	1		9	9	6	13
190	CONTACT	5	0	0	1	0	0	9	6	13
190	CONTACT	5	0	0	1	0	0	9	6	13
190	CONTACT	5	0	0	0	0	0	9	6	13
193	CASE	4	0	0	1	0	1	9	7	14	-5
193	CONTACT	4	1	0	1		1	9	7	14	-2
193	CONTACT	4	0	0	1	0	0	9	7	14
193	CONTACT	4	0	0	1	0	0	9	7	14
195	CASE	3	0	0	1	1	1	9	9	16	-3
195	CONTACT	3	0	0	0	0	0	9	9	16
195	CONTACT	3	0	0	1	0	0	9	9	16
196	CASE	4	1	0	1		1	9	3	10	-18
196	CONTACT	4	0	0	1		9	9	3	10
196	CONTACT	4	0	0	1	0	0	9	4	10
196	CONTACT	4	1	1	1	1	1	9	3	10	-3
198	CASE	3	0	0	1	0	1	9	10	17	-3
198	CONTACT	3	0	0	1	1	1	9	10	17	3
198	CONTACT	3	0	0	1	1	1	9	10	17	3
200	CASE	3	0	0	1	1	1	10	9	17	-1
200	CONTACT	3	0	0	0	1	1	10	9	17
200	CONTACT	3	0	0	1	1	1	10	9	17	0
201	CASE	4	1	0	1	1	1	9	6	13	-3
201	CONTACT	4	1	1	1		1	9	6	13	2
201	CONTACT	4	1	0	1	1	1	9	6	13	0
201	CONTACT	4	1	1	1	1	1	9	6	13	0
202	CASE	4	1	0	1		1	9	6	13	-1
202	CONTACT	4	0	0	1	1	1	9	6	13	3
202	CONTACT	4	0	0	1	1	1	9	6	13	20
202	CONTACT	4	0	0	1	1	1	9	6	13	0
203	CASE	4	1	0	1	1	1	9	7	14	-4
203	CONTACT	4	0	0	1	0	0	9	7	14
203	CONTACT	4	0	0	1	0	0	9	7	14
203	CONTACT	4	0	0	1	0	0	9	7	14
204	CASE	3	0	0	1	1	1	9	7	14	0
204	CONTACT	3	0	0	1	0	0	9	7	14
204	CONTACT	3	0	0	1	0	0	9	7	14
207	CASE	4	0	0	1	1	1	9	7	15	-3
207	CONTACT	4	1	0	1	1	1	9	7	15	0
207	CONTACT	4	0	0	1	0	0	9	7	15
207	CONTACT	4	0	0	1	1	1	9	7	15	12
208	CASE	4	1	0	1	1	1	9	7	14	0
208	CONTACT	4	0	0	1	0	0	9	7	14
208	CONTACT	4	0	0	1	0	0	9	7	14
208	CONTACT	4	0	0	0	0	0	9	7	14
209	CASE	4	0	0	1	1	1	9	8	15	-4
209	CONTACT	4	0	0	1	1	1	9	8	15	8
209	CONTACT	4	0	0	1	1	1	9	8	15	0
209	CONTACT	4	0	0	0		9	9	8	15
211	CASE	4	0	0	1	1	1	9	5	12	0
211	CONTACT	4	0	0	1		9	9	5	12
211	CONTACT	4	0	0	1		9	9	5	12
211	CONTACT	4	0	0	1	0	0	9	5	12
212	CASE	4	1	0	1	1	1	9	7	14	-1
212	CONTACT	4	0	1	1	1	1	9	7	14	1
212	CONTACT	4	0	0	1		9	9	7	14
212	CONTACT	4	1	0	1	1	1	9	7	14	1
214	CASE	3	0	1	1		1	9	7	14	-4
214	CONTACT	3	0	0	1	0	0	9	7	14
214	CONTACT	3	0	0	1	1	1	9	7	14	6
215	CASE	5	1	0	1	1	1	10	4	11	0
215	CONTACT	5	1	1	1	1	1	10	4	11	2
215	CONTACT	5	0	0	1	1	1	10	4	11	1
215	CONTACT	5	1	1	1	1	1	10	4	11	3
215	CONTACT	5	0	1	1	1	1	10	4	11	1
216	CASE	7	0	0	1		1	9	10	17	-3
216	CONTACT	7	1	0	1		1	9	10	17	-1
216	CONTACT	7	1	0	1		1	9	10	17	0
216	CONTACT	7	0		1		9	9	10
216	CONTACT	7	1	0	1		1	9	10	17	-1
216	CONTACT	7	1	0	1		1	9	10	17	-3
216	CONTACT	7	0	0	0		9	9	10	17
217	CASE	3	0	0	1	1	1	10	6	14	-2
217	CONTACT	3	0	0	1		9	10	6	14
217	CONTACT	3	0	0	1	1	1	10	6	14	3
218	CASE	3	1	1	1	1	1	10	7	14	-2
218	CONTACT	3	0	0	1	0	0	10	7	14
218	CONTACT	3	0	0	1	0	0	10	7	14
219	CASE	2	0	0	1		1	10	7	15	-1
219	CONTACT	2	1	0	1	1	1	10	7	15	2
220	CASE	4	0	0	1	1	1	10	7	14	0
220	CONTACT	4	0	0	1	0	0	10	7	14
220	CONTACT	4	0	0	0	0	0	10	7	14
220	CONTACT	4	0	0	0	0	0	10	7	14
221	CASE	3	1	0	1	1	1	10	4	11	-1
221	CONTACT	3	0	0	1	0	0	10	4	11
221	CONTACT	3	0	0	1	0	0	10	4	11
223	CASE	4	1	0	1		1	10	7	14	-1
223	CONTACT	4	0	0	1		9	10	7	14
223	CONTACT	4	1	1	1	1	1	10	7	14	7
223	CONTACT	4	1	1	1	1	1	10	7	14	0
224	CASE	3	1	0	1	1	1	10	7	14	0
224	CONTACT	3	0	0	1	0	0	10	7	14
224	CONTACT	3	0	0	1	0	0	10	7	14
225	CASE	5	1	0	1		1	10	7	14	0
225	CONTACT	5	1	1	0		1	10	7	14
225	CONTACT	5	0	0	0		9	10	7	14
225	CONTACT	5	1	0	0	1	1	10	7	14
225	CONTACT	5	1	0	1	1	1	10	7	14	1
226	CASE	5	0	0	1	1	1	10	8	15	-3
226	CONTACT	5	0	0	0	0	0	10	8	15
226	CONTACT	5	0	0	0	0	0	10	8	15
226	CONTACT	5	0	0	0		9	10	8	15
226	CONTACT	5	0	0	0	0	0	10	8	15
227	CASE	4	1	0	1	1	1	10	9	16	0
227	CONTACT	4	0	0	1		9	10	9	16
227	CONTACT	4	0	0	1	0	0	10	9	16
227	CONTACT	4	0	0	1	0	0	10	9	16
228	CASE	4	0	0	1	1	1	10	4	11	-1
228	CONTACT	4	0	0	0	0	0	10	4	11
228	CONTACT	4	0	0	0	0	0	10	4	11
228	CONTACT	4	0	0	0	0	0	10	4	11
229	CASE	4	1	1	1	1	1	10	4	11	0
229	CONTACT	4	0	0	0	0	0	10	4	11
229	CONTACT	4	0	0	1	0	0	10	4	11
229	CONTACT	4	1	1	1	1	1	10	4	11	1
230	CASE	4	1	0	1	1	1	10	5	12	-1
230	CONTACT	4	0	0	1	0	0	10	5	12
230	CONTACT	4	0	0	1	0	0	10	5	12
230	CONTACT	4	1	0	1	1	1	10	5	12	1
233	CASE	4	0	0	1	1	1	10	6	13	-1
233	CONTACT	4	1	0	1	1	1	10	6	13	5
233	CONTACT	4	1	1	1	1	1	10	6	13	0
233	CONTACT	4	0	1	1	1	1	10	6	13	7
242	CASE	4	1	0	1	1	1	10	7	14	0
242	CONTACT	4	0	0	1	0	0	10	7	14
242	CONTACT	4	0	0	1		9	10	7	14
242	CONTACT	4	0	0	1	0	0	10	7	14
243	CASE	4	1	0	1	1	1	10	7	14	-1
243	CONTACT	4	1	1	1	1	1	10	7	14	7
243	CONTACT	4	0	0	0	0	0	10	7	14
243	CONTACT	4	0	0	0	1	1	10	7	14
244	CASE	4	1	0	1	1	1	10	4	11	-2
244	CONTACT	4	0	0	0	0	0	10	4	11
244	CONTACT	4	0	0	1	1	1	10	4	11	4
244	CONTACT	4	0	0	0	0	0	10	4	11
245	CASE	4	1	0	1	1	1	10	5	13	-1
245	CONTACT	4	0	0	1		9	10	5	13
245	CONTACT	4	0	1	1	1	1	10	5	13	12
245	CONTACT	4	1	1	1	1	1	10	5	13	3
246	CASE	3	0	0	1	1	1	10	7	14	-4
246	CONTACT	3	1	0	1	1	1	10	7	14	0
246	CONTACT	3	0	0	1	0	0	10	7	14
248	CASE	5	1	1	1	1	1	10	7	14	-1
248	CONTACT	5	0	0	0	0	0	10	7	14
248	CONTACT	5	0	0	1	0	0	10	7	14
248	CONTACT	5	0	0	1	1	1	10	7	14	4
248	CONTACT	5	0	0	1	0	0	10	7	14
249	CASE	3	1	0	1	1	1	11	6	13	-1
249	CONTACT	3	1	0	1	1	1	11	6	13	3
249	CONTACT	3	1	0	1	1	1	11	6	13	0
250	CASE	6	1	0	1		1	11	6	13	0
250	CONTACT	6	1	0	1		1	11	6	13	5
250	CONTACT	6	1	1	1		1	11	6	13	1
250	CONTACT	6	1	0	1		1	11	6	13	2
250	CONTACT	6	1	1	1		1	11	6	13	3
250	CONTACT	6	0	0	1		9	11	6	13
252	CASE	2	0	0	1	1	1	11	7	14	-1
252	CONTACT	2	1	0	1	1	1	11	7	14	2
253	CASE	5	0	0	1	1	1	11	8	15	0
253	CONTACT	5	0	0	1	0	0	11	8	15
253	CONTACT	5	0	0	1	0	0	11	8	15
253	CONTACT	5	0	0	0	0	0	11	8	15
253	CONTACT	5	0	0	1	0	0	11	8	15
254	CASE	4	1	0	1	1	1	11	7	14	-2
254	CONTACT	4	1	1	1	1	1	11	7	14	1
254	CONTACT	4	0	0	1	0	0	11	7	14
254	CONTACT	4	0	0	0	0	0	11	7	14
255	CASE	4	1	0	1	1	1	11	5	12	0
255	CONTACT	4	0	0	0		9	11	5	12
255	CONTACT	4	0	1	1	1	1	11	5	12	3
255	CONTACT	4	0	0	0	1	1	11	5	13
256	CASE	4	1	1	1	1	1	11	6	13	-1
256	CONTACT	4	0	0	1	0	0	11	6	13
256	CONTACT	4	0	0	0	0	0	11	6	13
256	CONTACT	4	0	0	0	0	0	11	6	13
257	CASE	4	1	0	1	1	1	11	6	13	0
257	CONTACT	4	0	0	0	0	0	11	6	13
257	CONTACT	4	0	0	1	1	1	11	6	13	2
257	CONTACT	4	0	0	1	0	0	11	6	13
258	CASE	4	1	0	1	1	1	11	7	13	0
258	CONTACT	4	0	0	0	0	0	11	7	13
258	CONTACT	4	0	0	1	0	0	11	7	13
258	CONTACT	4	0	0	1	0	0	11	7	13
259	CASE	3	0	0	1	1	1	11	6	13	-5
259	CONTACT	3	0	0	1	0	0	11	6	13
259	CONTACT	3	0	0	1	0	0	11	6	13
260	CASE	5	0	0	1	1	1	11	7	14	0
260	CONTACT	5	1	0	1	1	1	11	7	14	2
260	CONTACT	5	0	0	1	1	1	11	7	14	6
260	CONTACT	5	0	0	1	0	0	11	7	14
260	CONTACT	5	0	0	1	0	0	11	7	14

## Sheet: details
Each line in the dataset corresponds to a unique patient. Details describing the contents of each column are provided below.
hoconumber	household id
status	CASE = Index, Contact = Contact
householdsize	number in household
swab1	0=neg, 1=pos, miss = not done
swab2	0=neg, 1=pos, miss = not done
symptoms	0 = no, 1 =yes, (will also show a 1 if symptoms even if not infected but for all intervals below the date of first symptoms was set to missing if someone had symptoms but was not infected)
antib	0=neg, 1=pos, miss = not done. Note this is >=5 by RBD assay or >=0.8 on Abbott
infected	0 = no evidence but antibody testing done, 1 = PCR or antib pos, 999 = pcr neg or missing and antibody testing not done
month_case_swab	month the case was swabbed and found positive to be recruited into the study
case_swab_swab1	days from index case being swabbed to the first study swab
case_swab_swab2	days from index case being swabbed to the second study swab
case_swab_ill	days from index case being swabbed to the date if illness (cases and contacts)
