# Supplementary figures and images for: Inference of the SARS-CoV-2 generation time using UK household data
Source: eLife journal article supplement (doi:10.7554/elife.70767), 2022-02-09

**A.**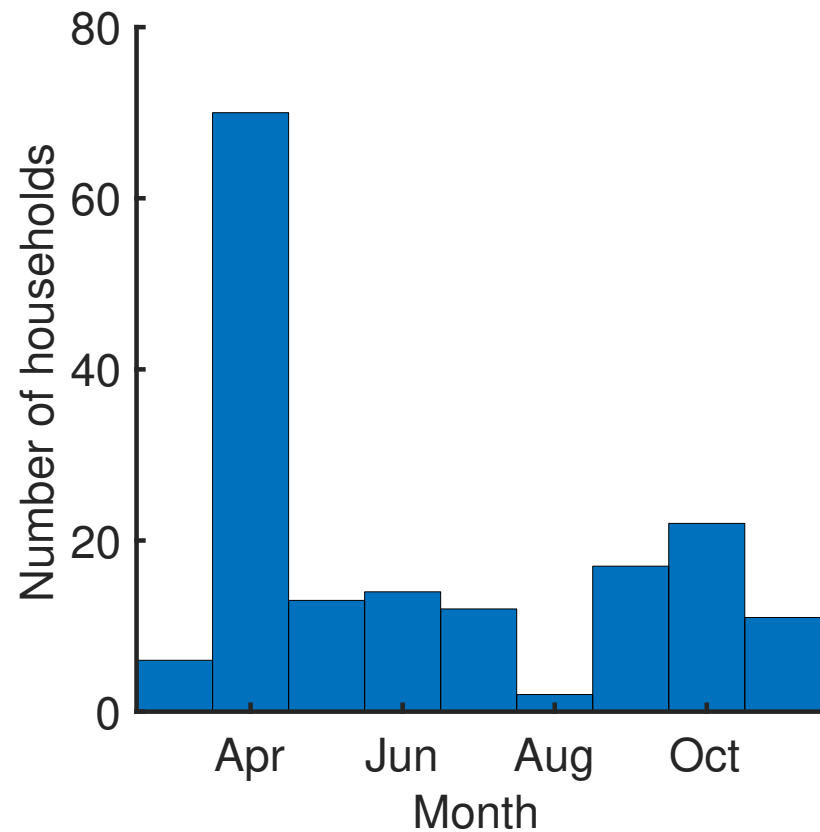**B.**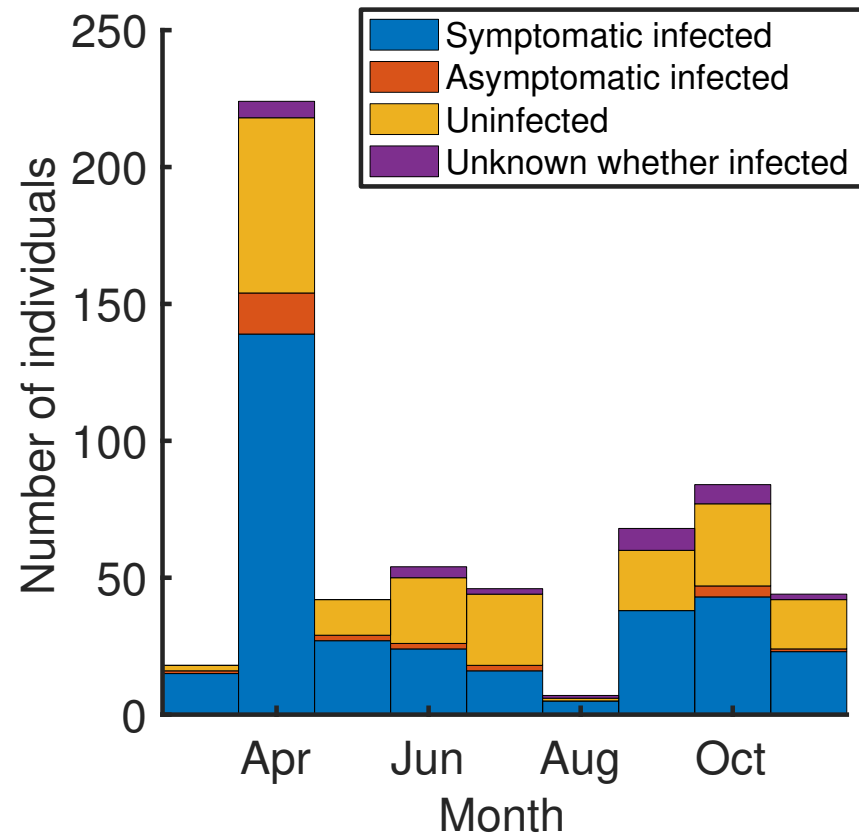

Supplement: supp [file elife-70767-supp-v1.zip]

**A.**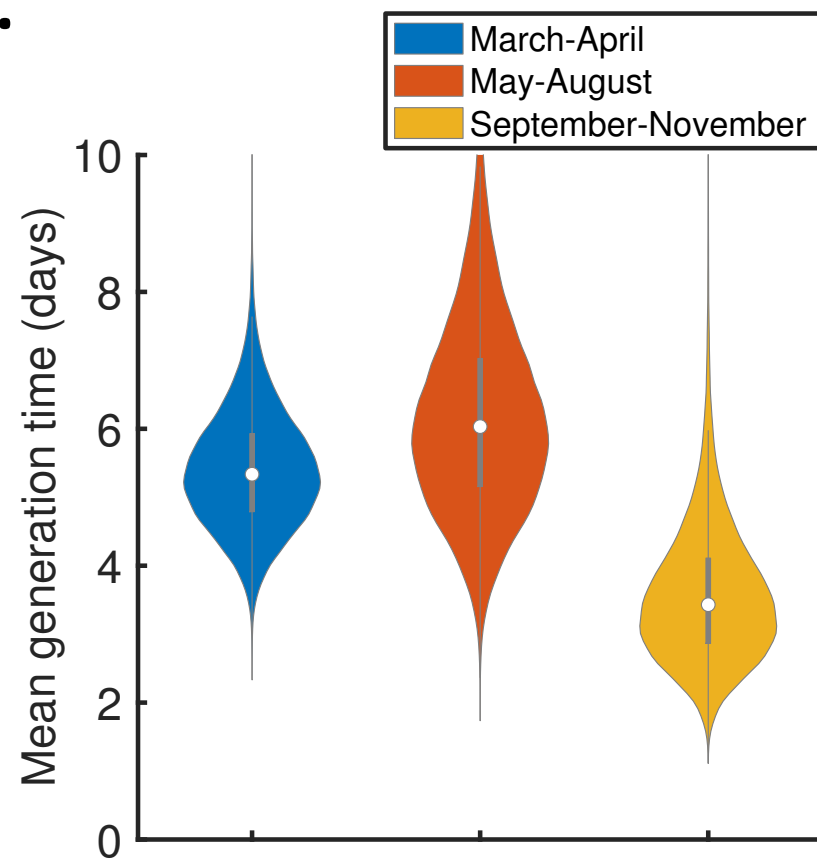**B.**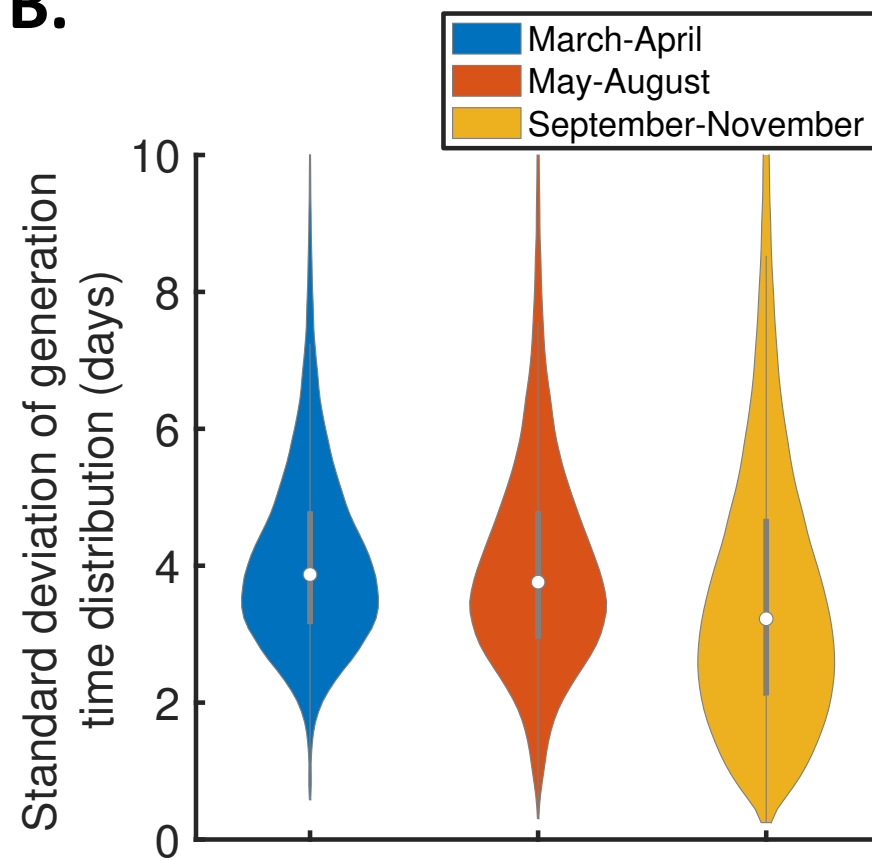**C.**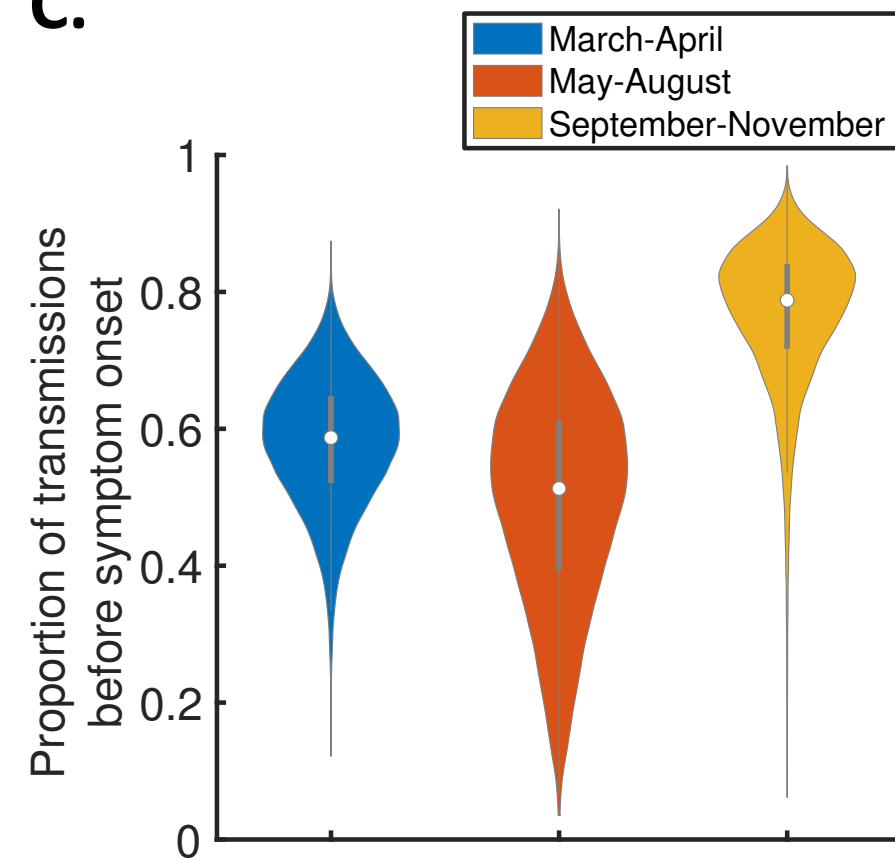**D.**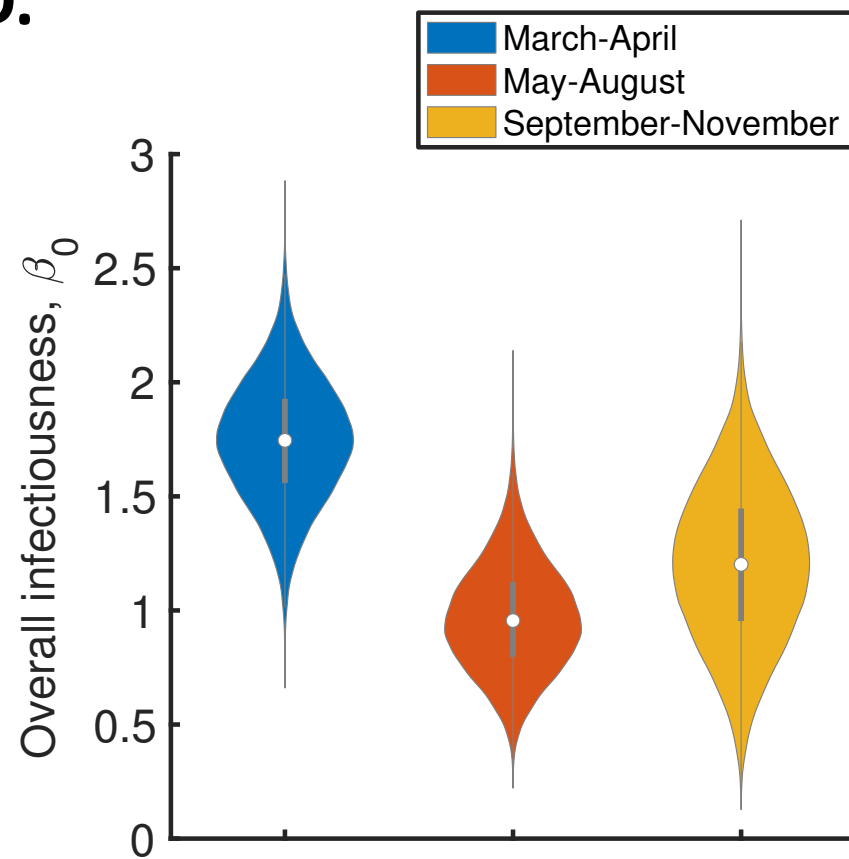**E.**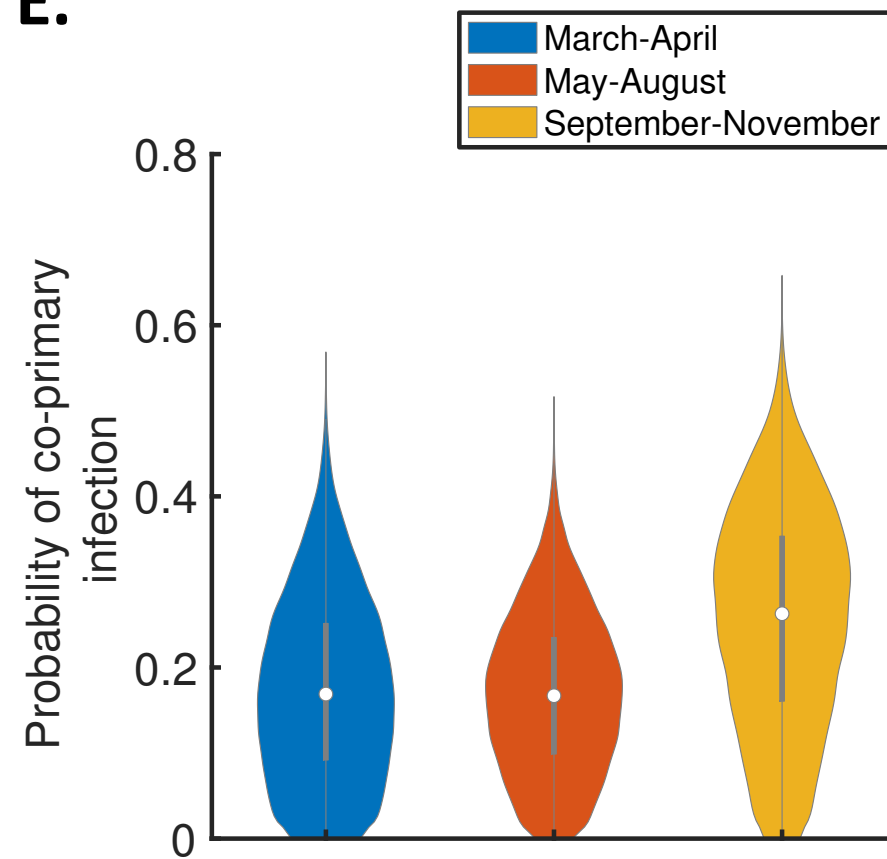

Supplement: supp [file elife-70767-supp-v1.zip]

**A.**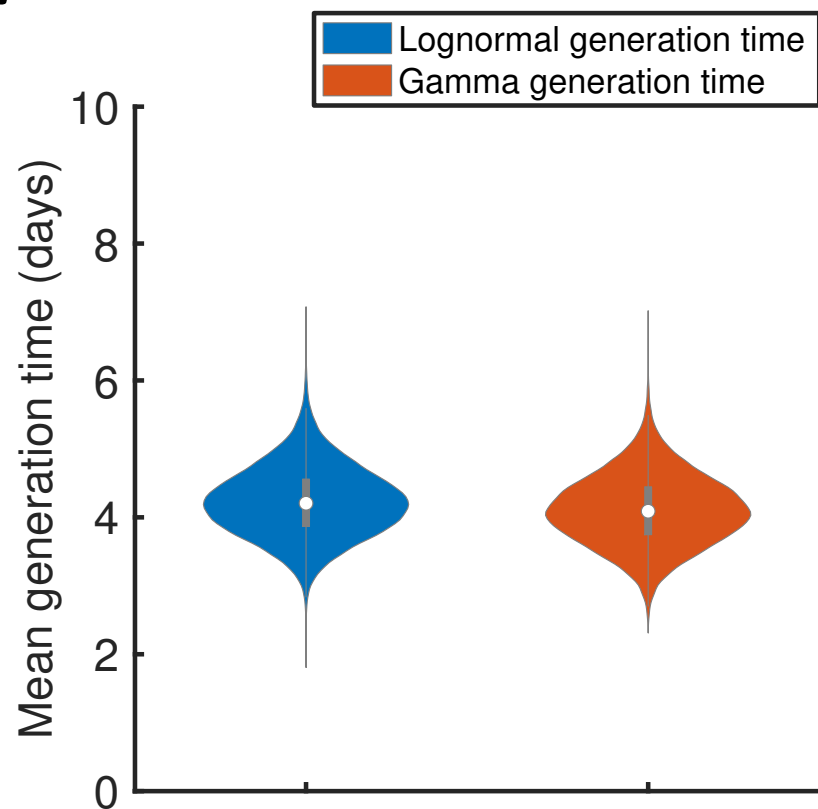**B.**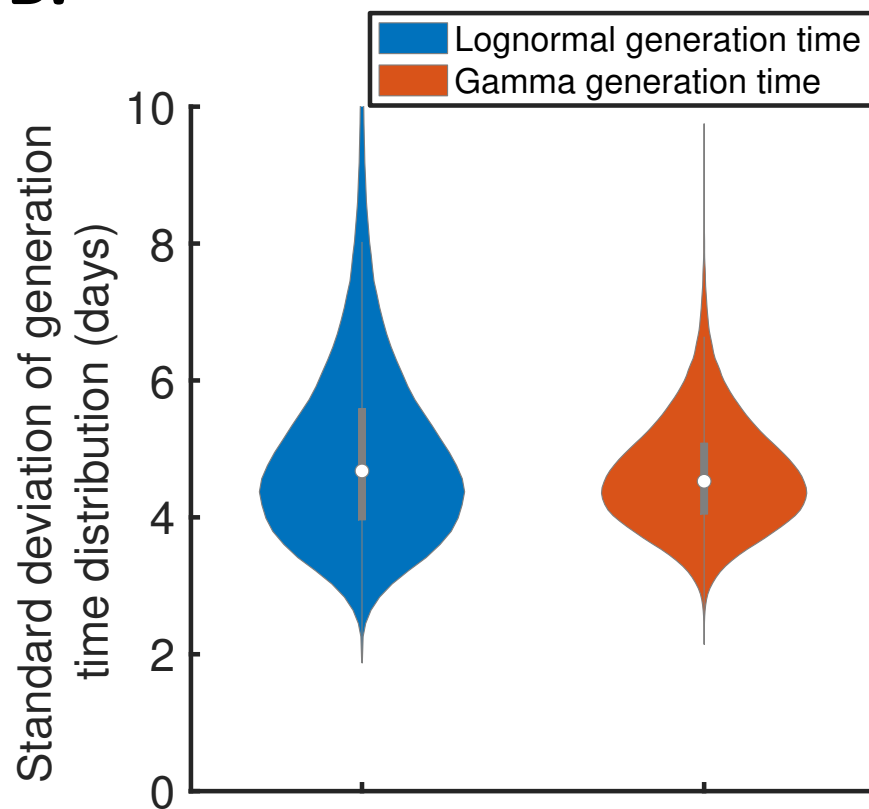**C.**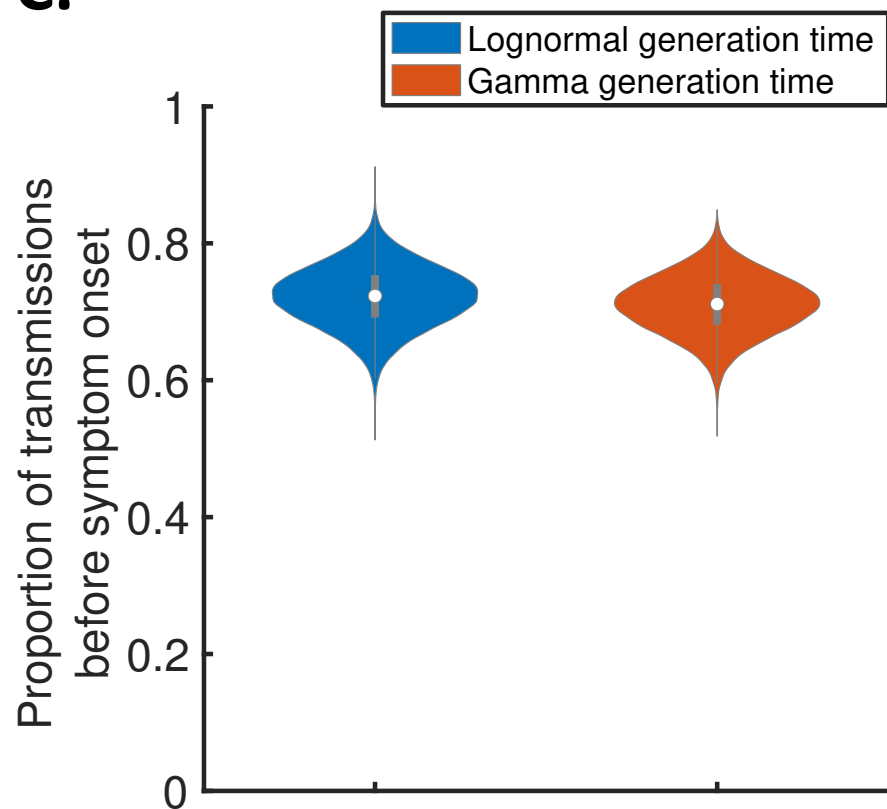**D.**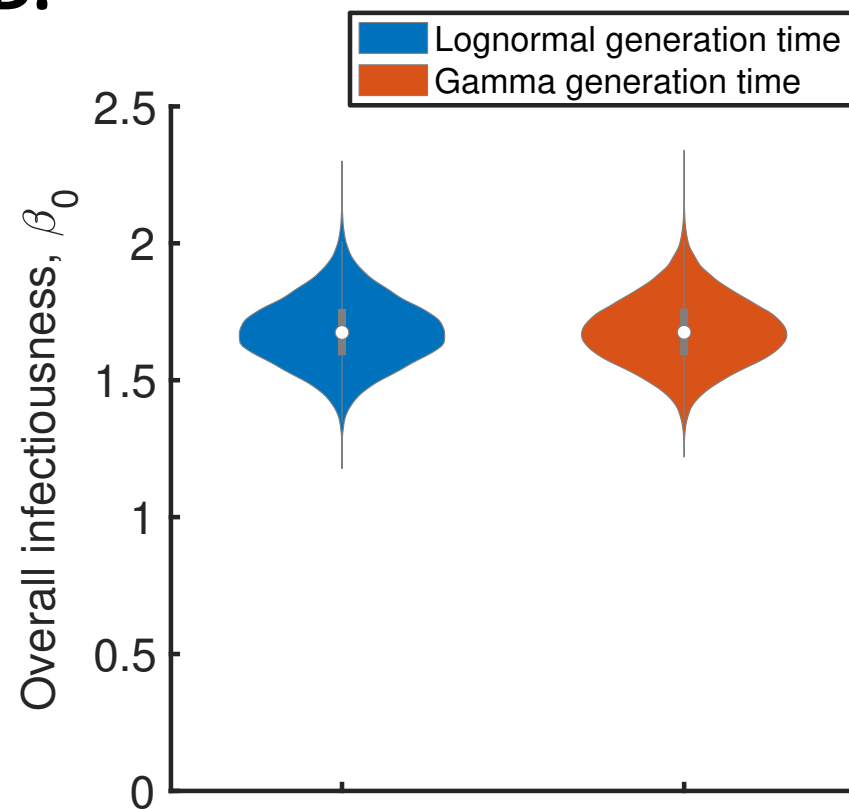

Supplement: supp [file elife-70767-supp-v1.zip]

**A.**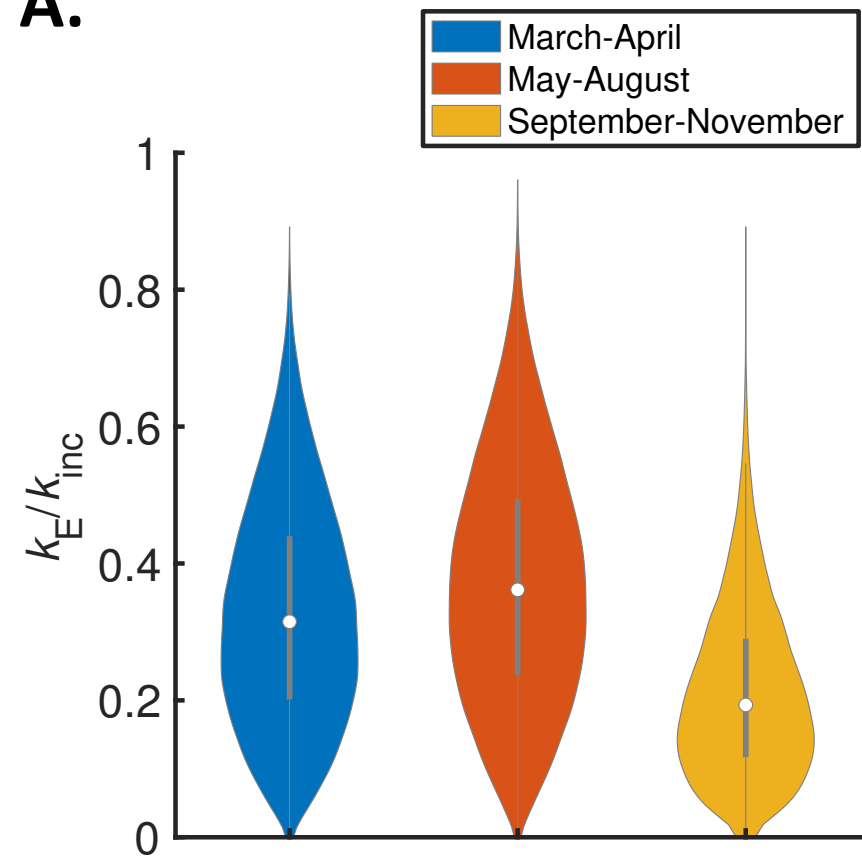**B.**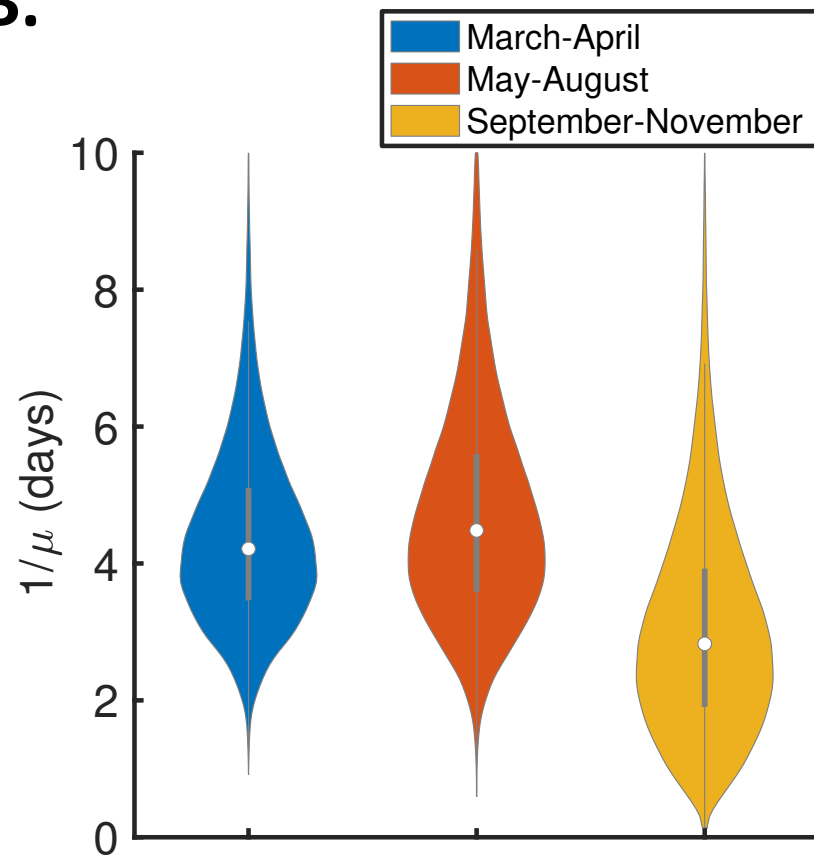**C.**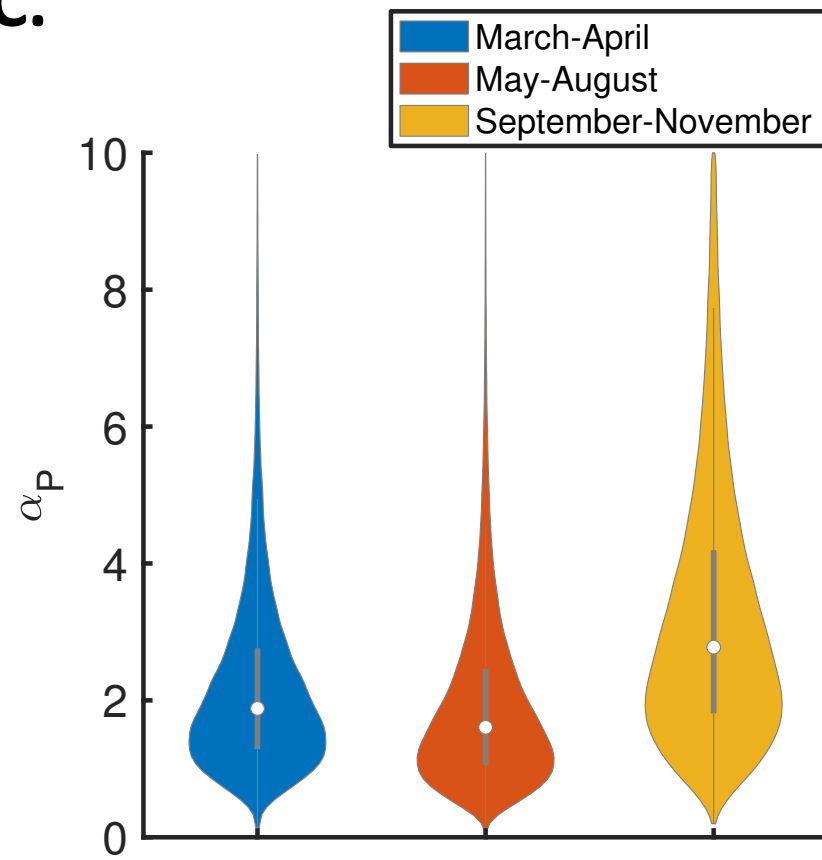

Supplement: supp [file elife-70767-supp-v1.zip]

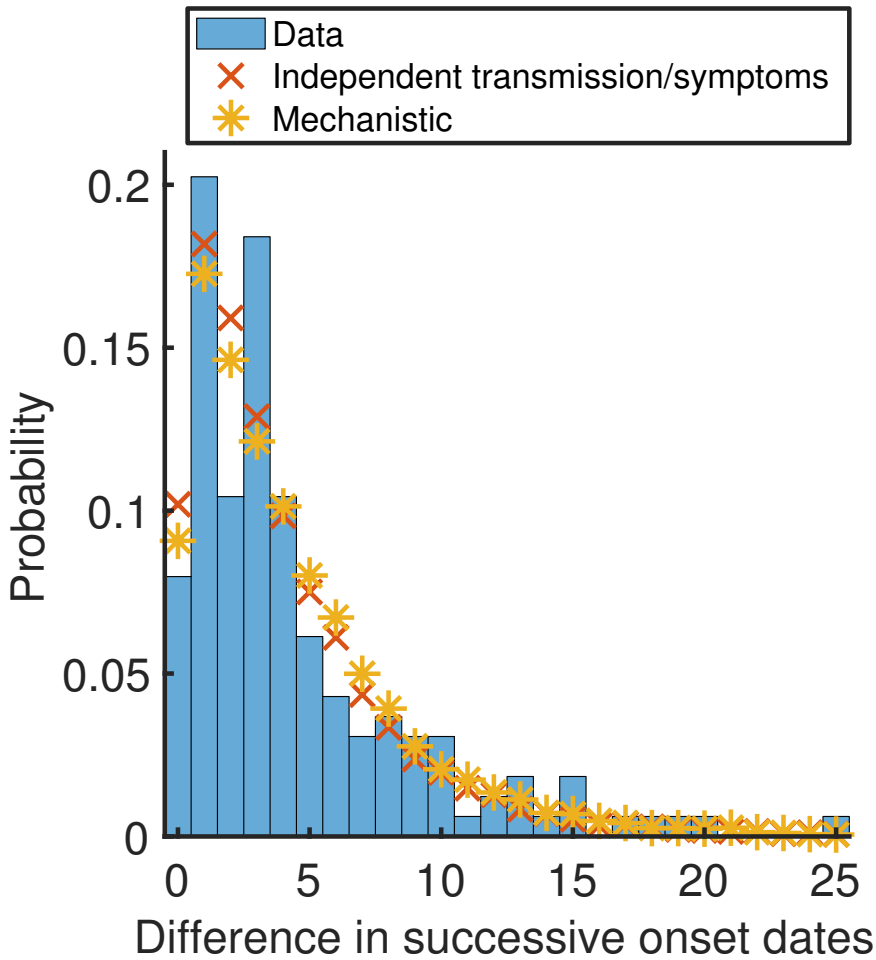

Supplement: supp [file elife-70767-supp-v1.zip]

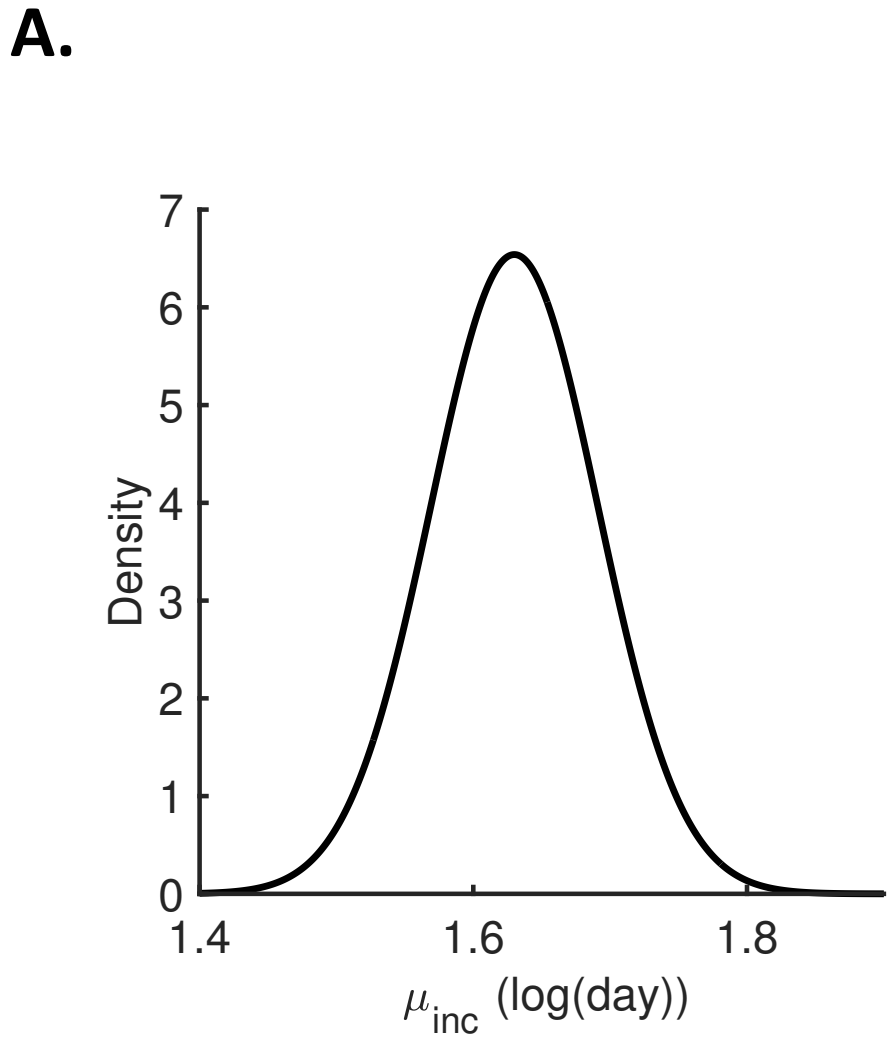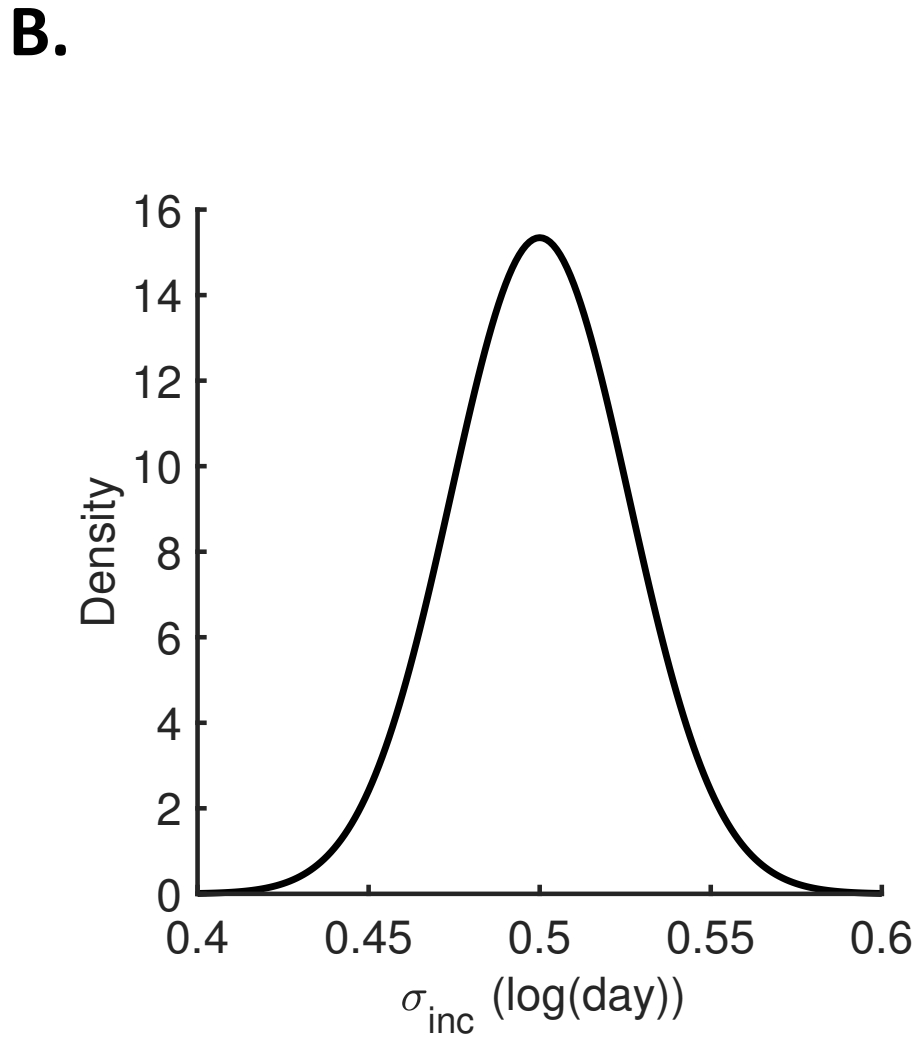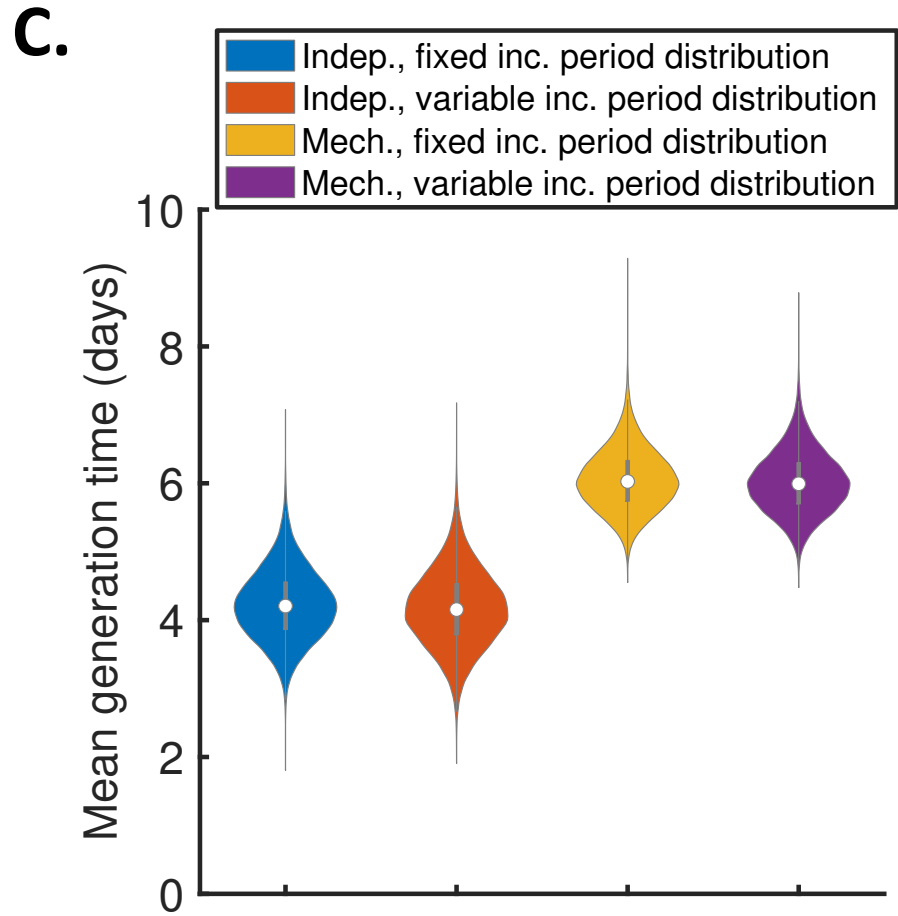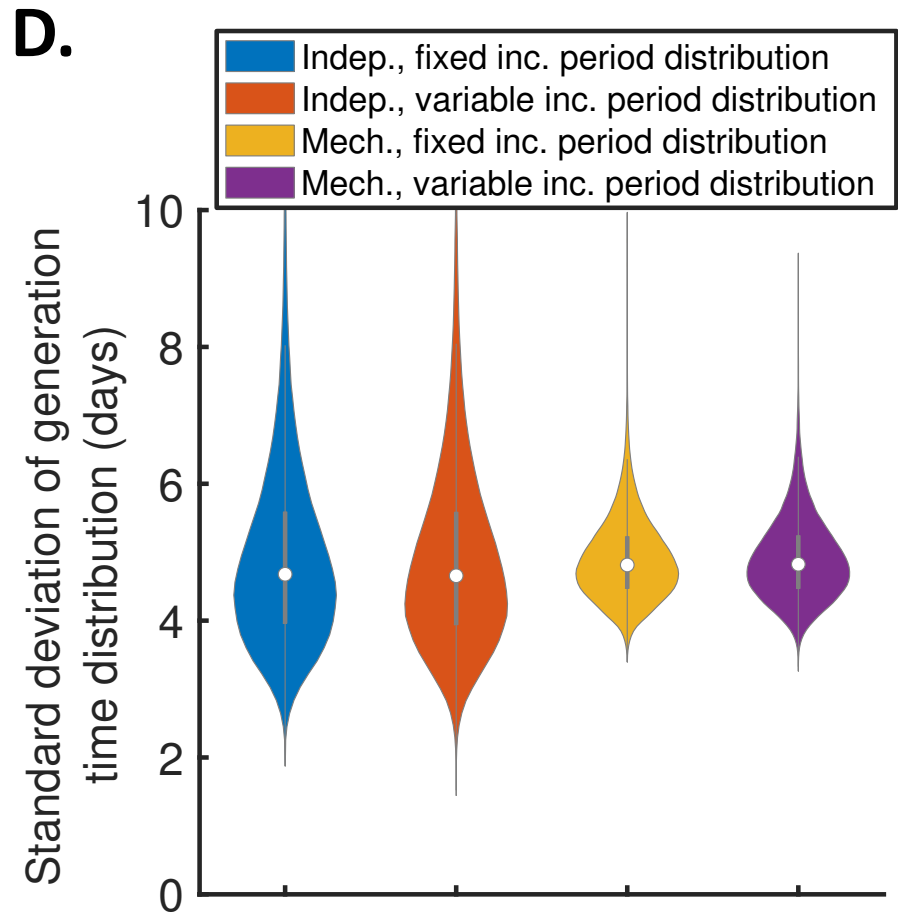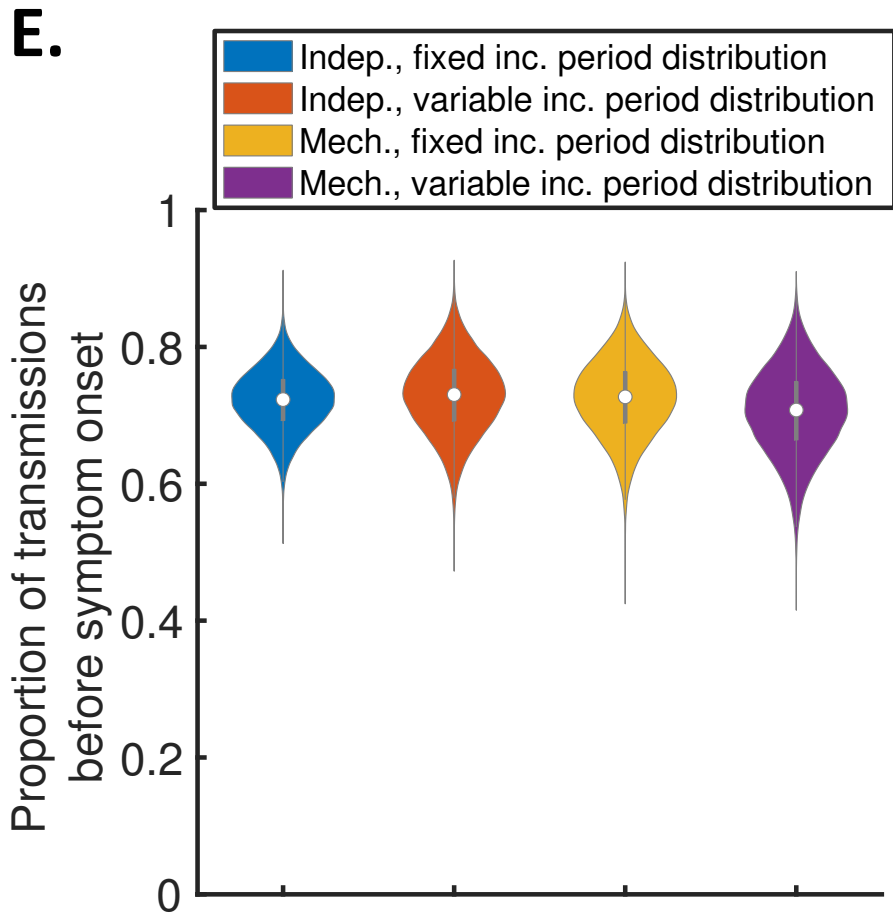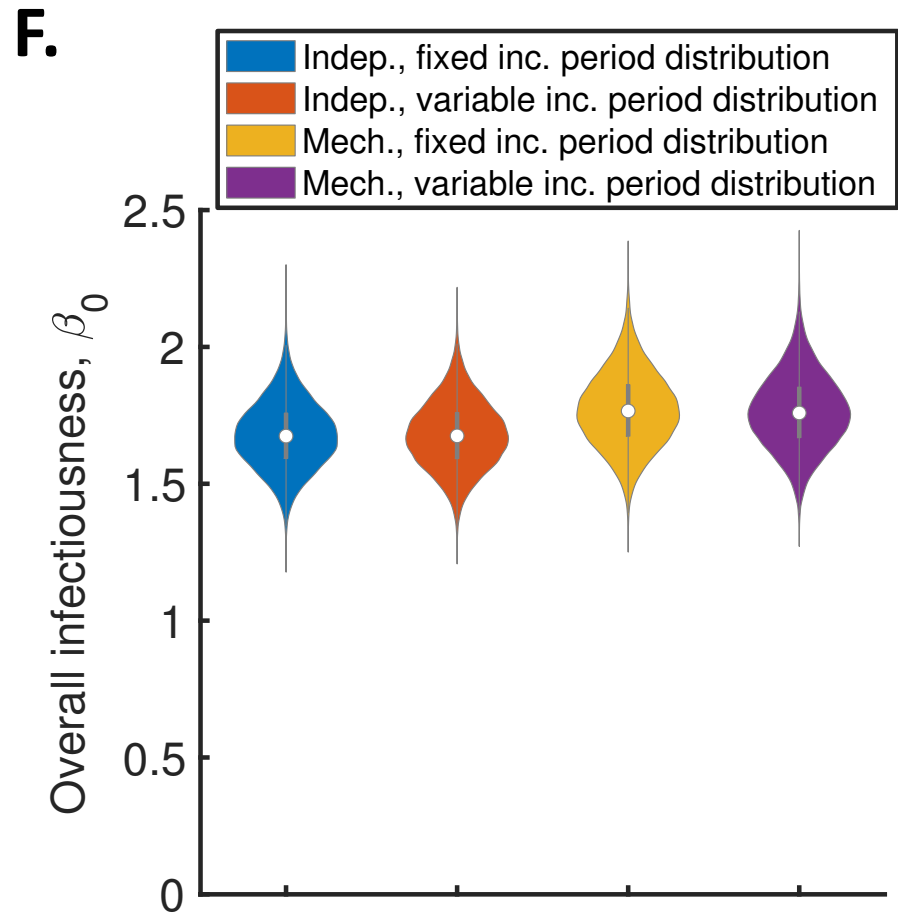

Supplement: supp [file elife-70767-supp-v1.zip]

**A.**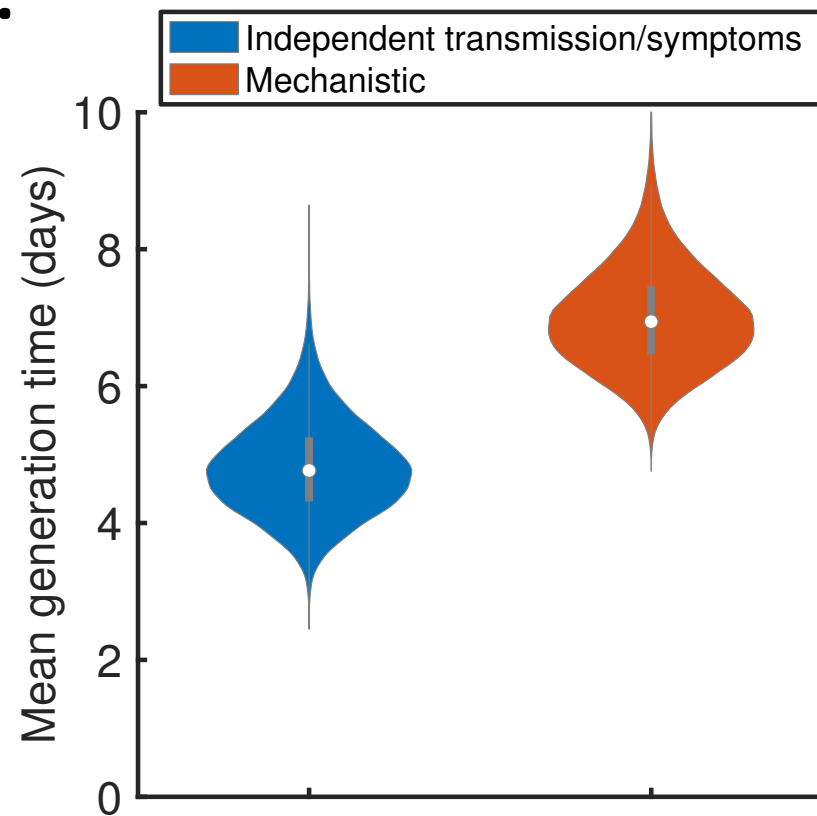**B.**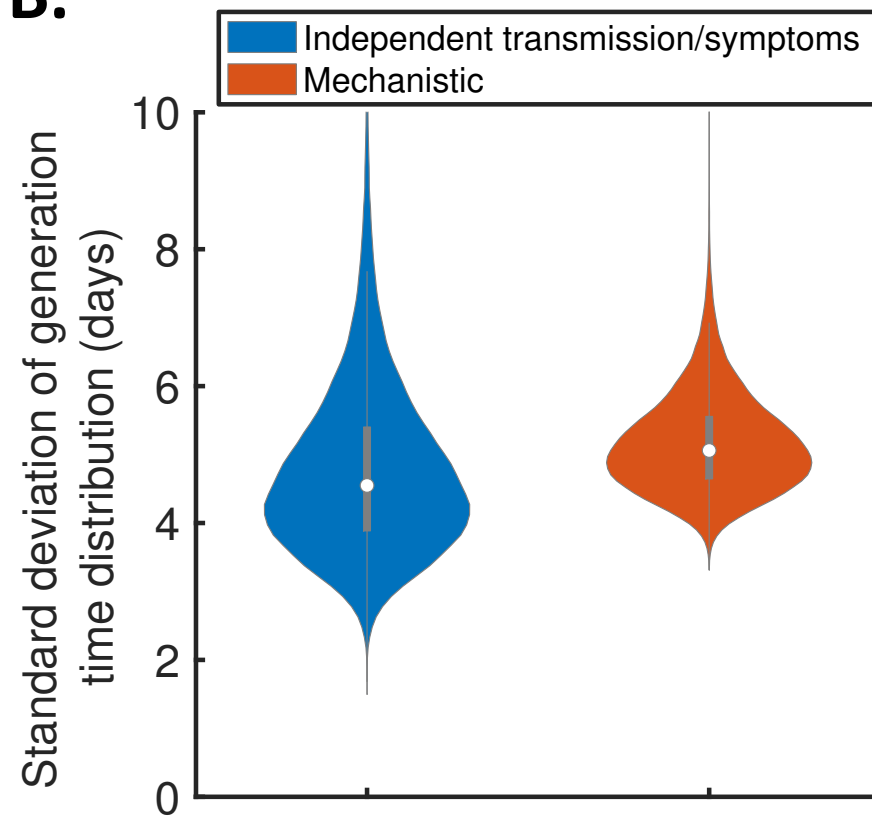**C.**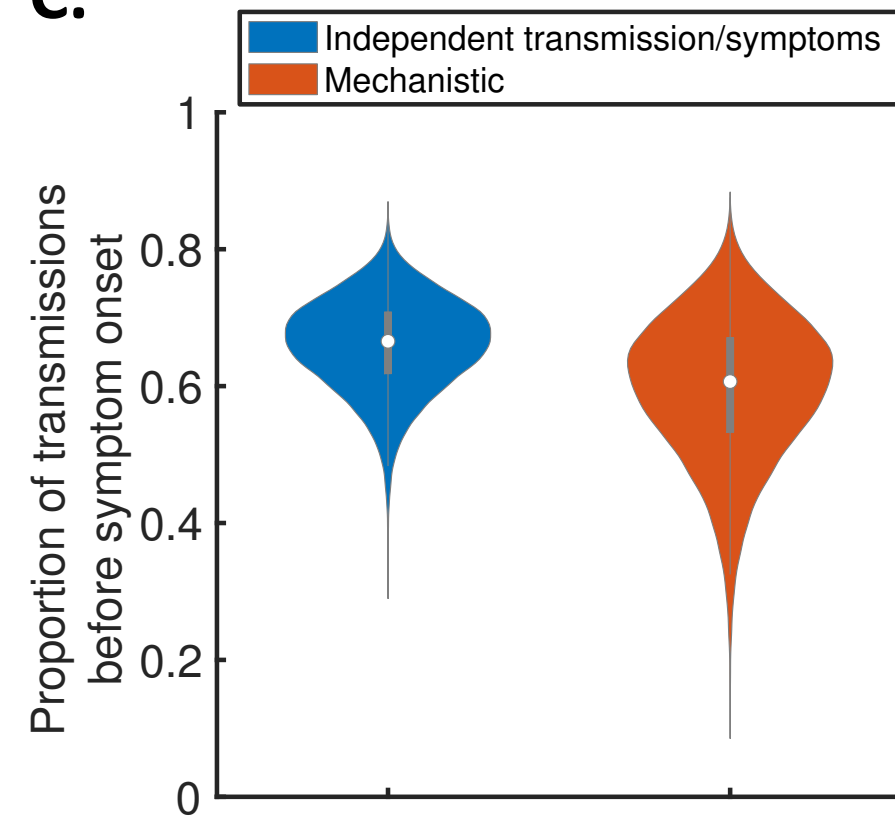**D.**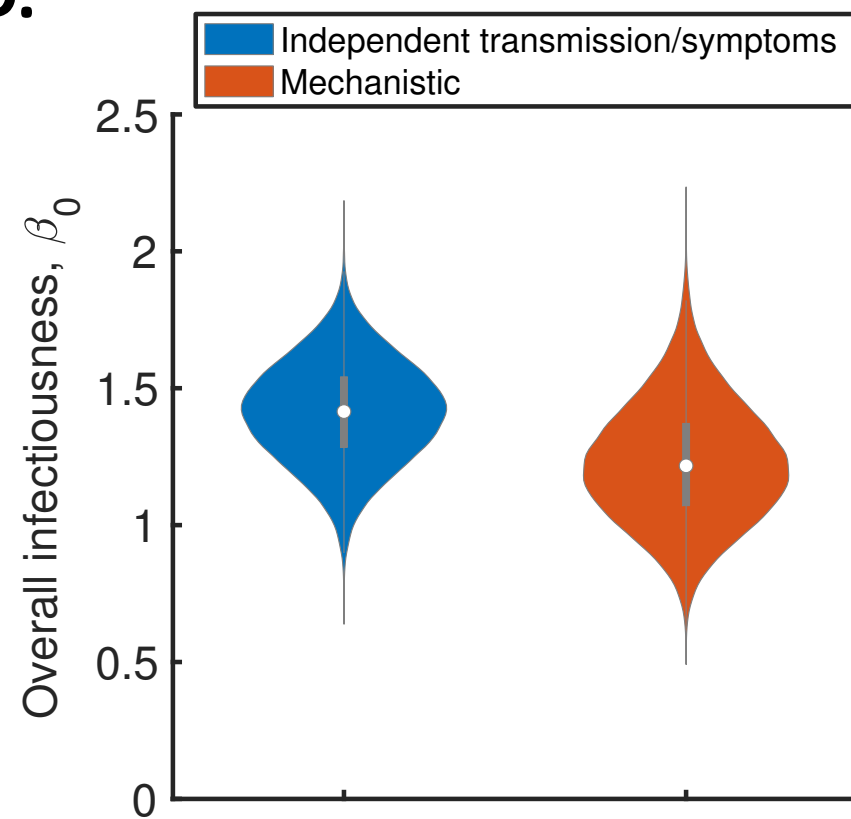**E.**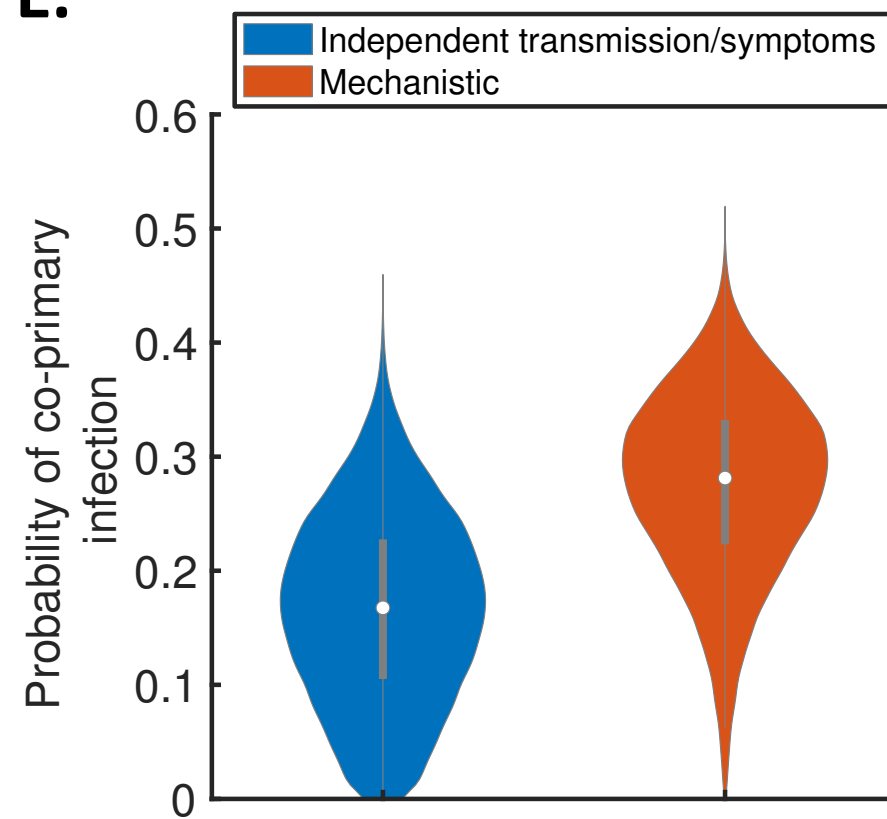

Supplement: supp [file elife-70767-supp-v1.zip]

**A.**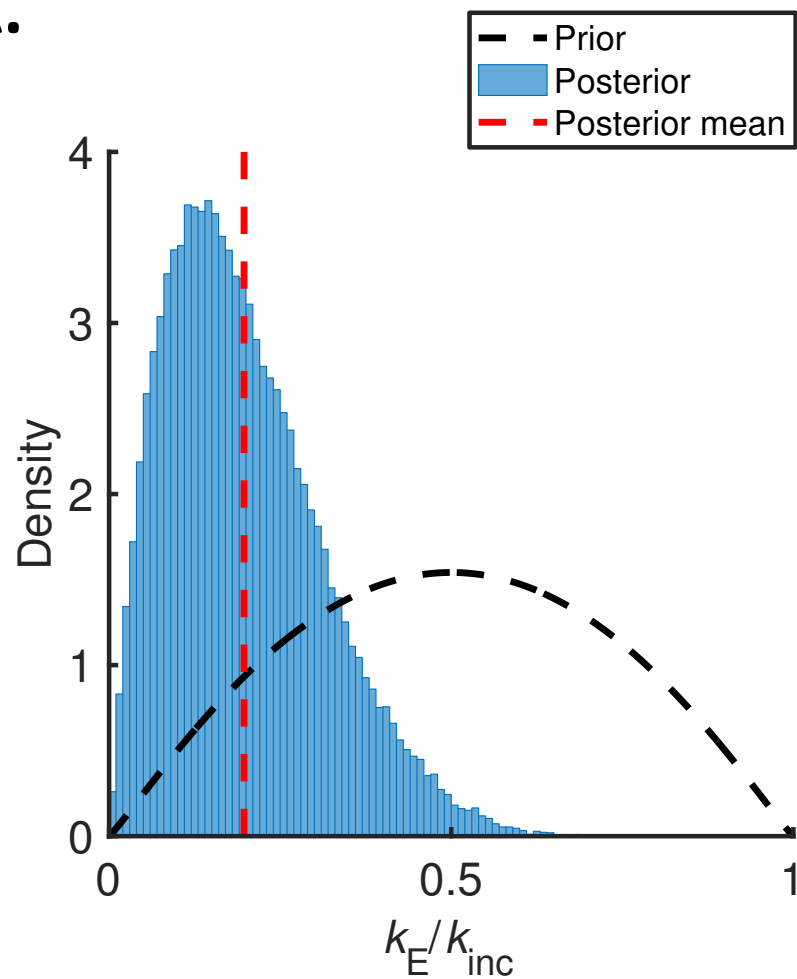**B.**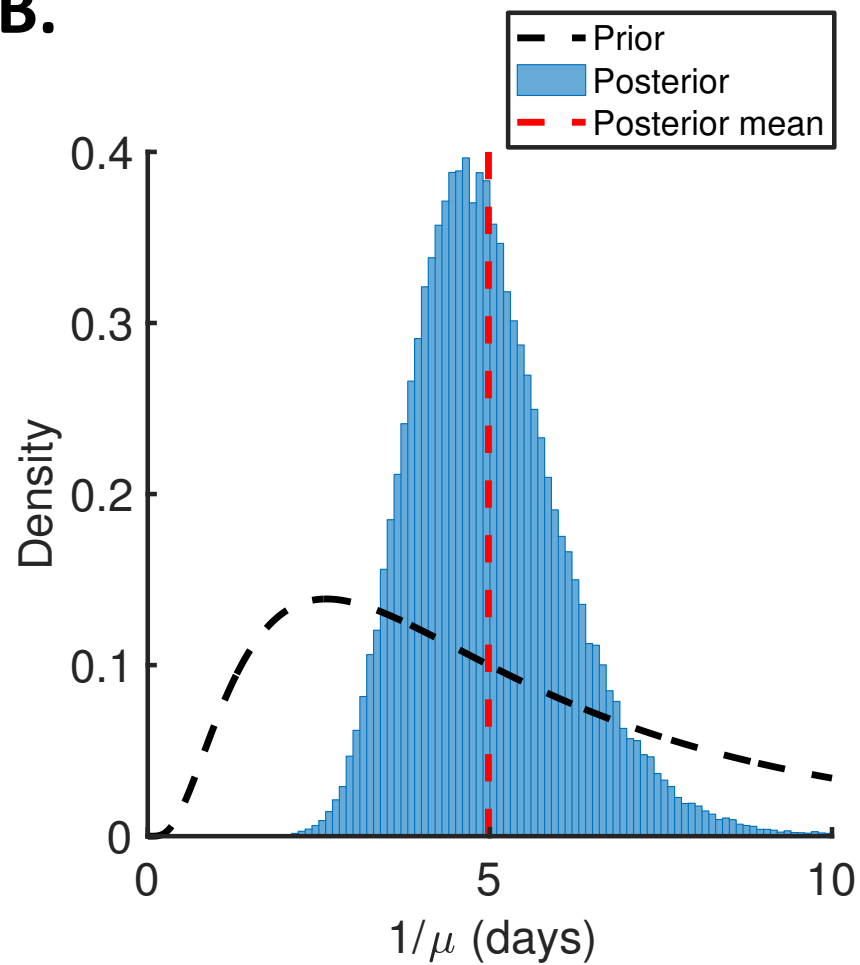**C.**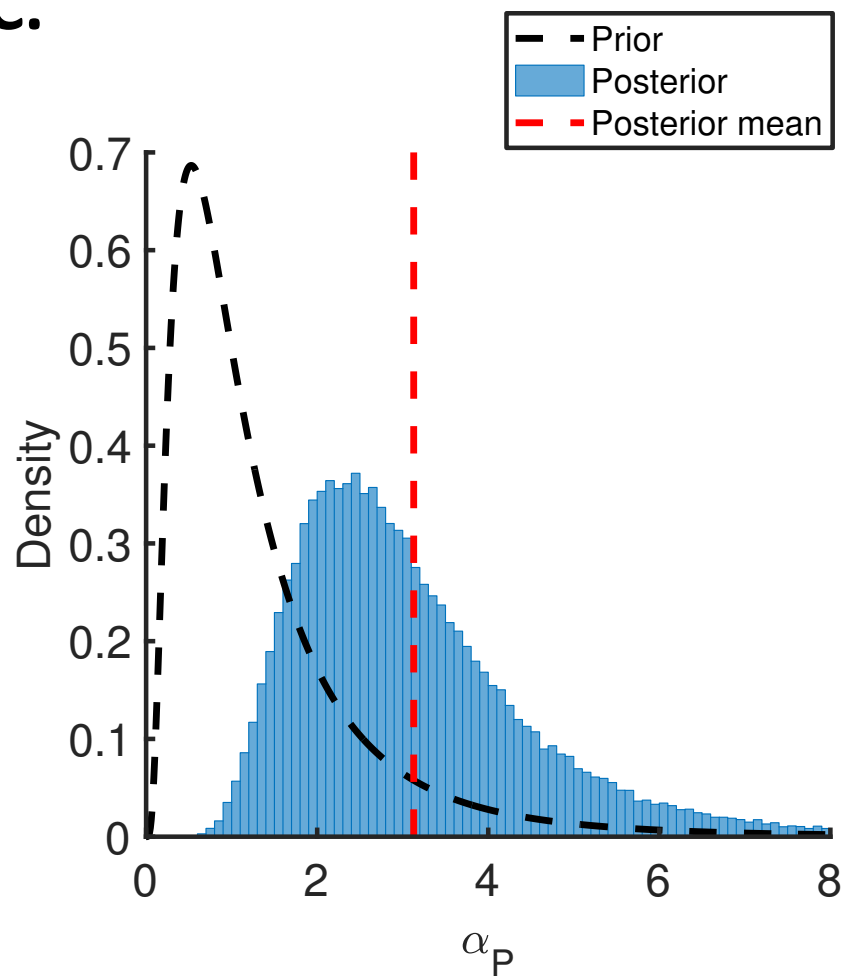**D.**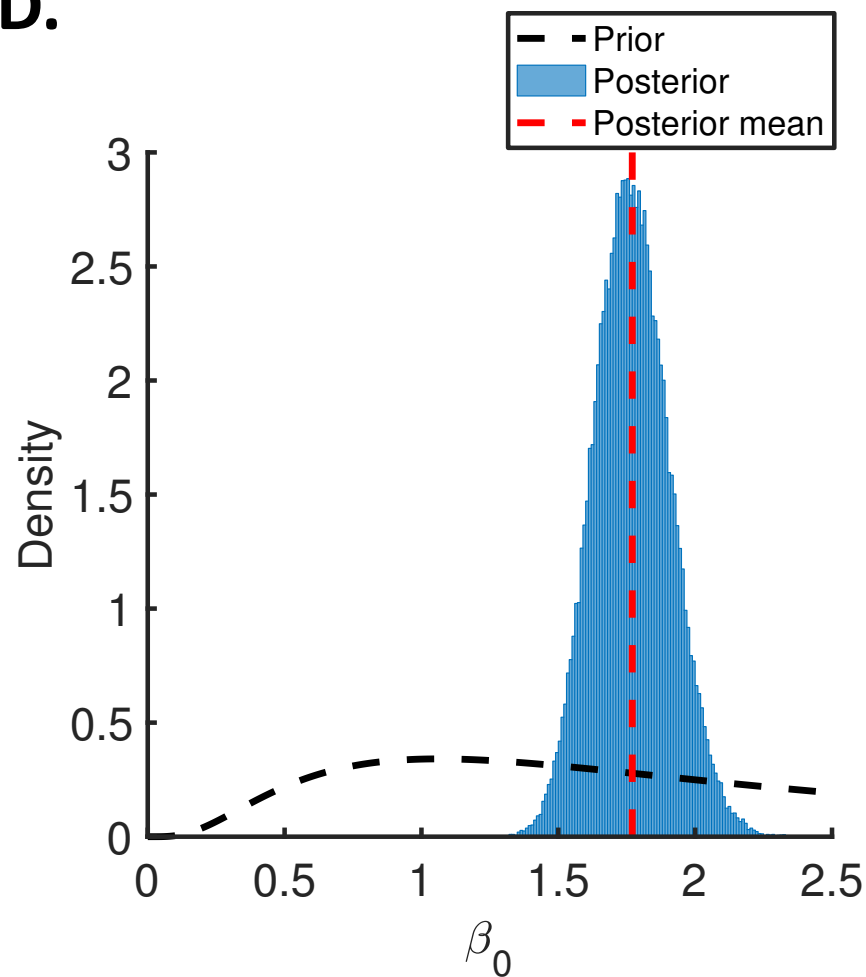

Supplement: supp [file elife-70767-supp-v1.zip]

**A.**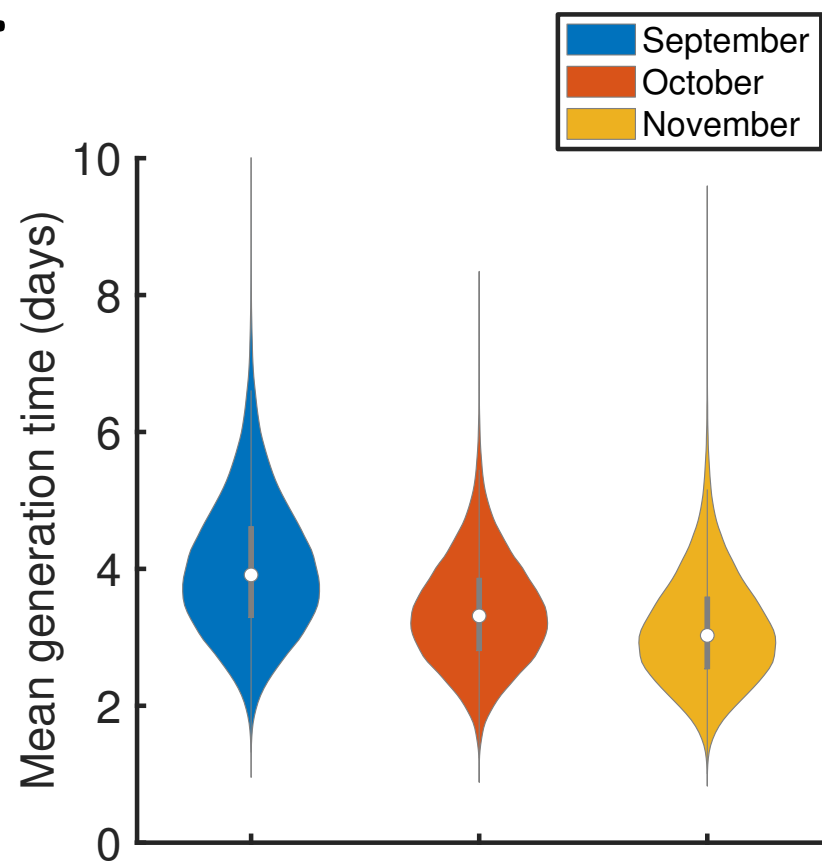**B.**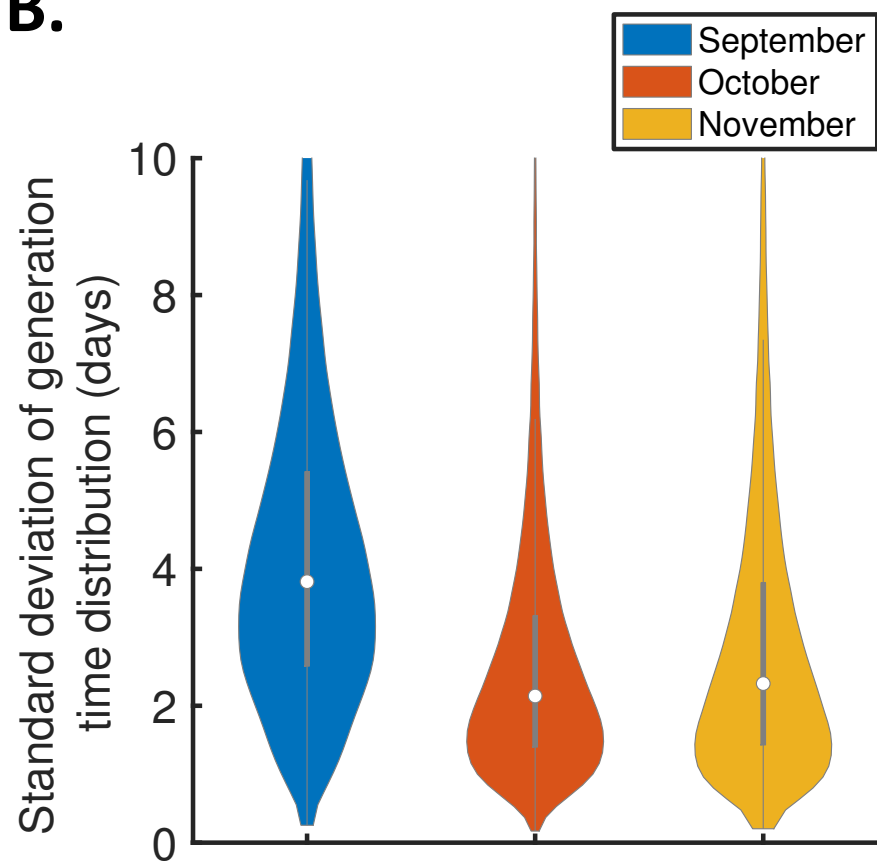**C.**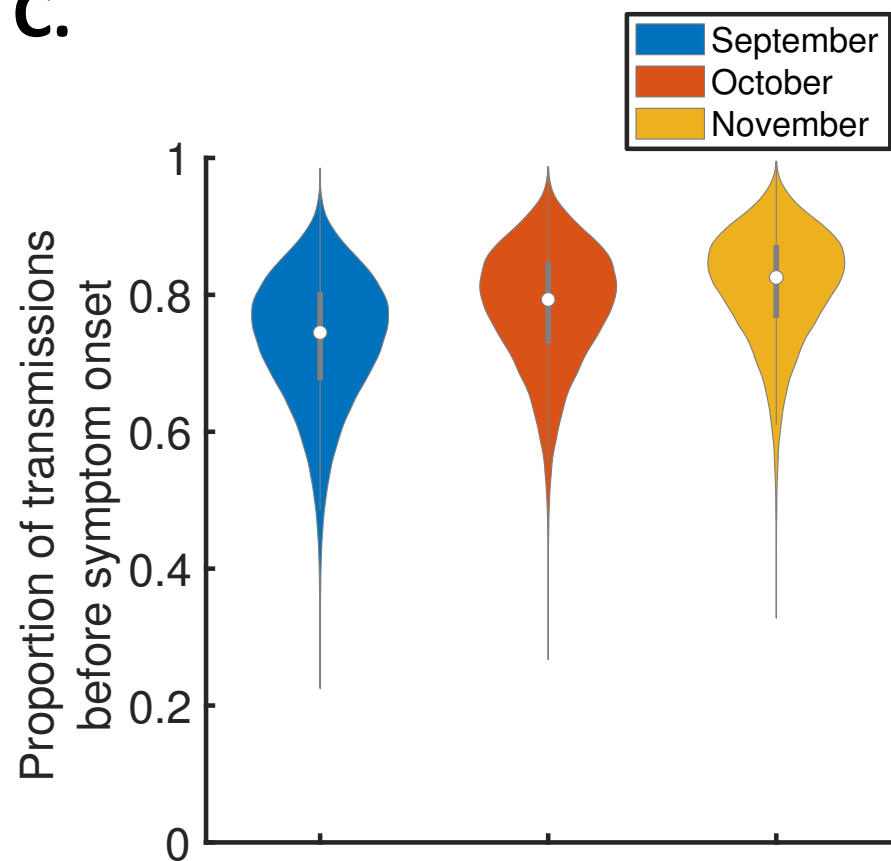**D.**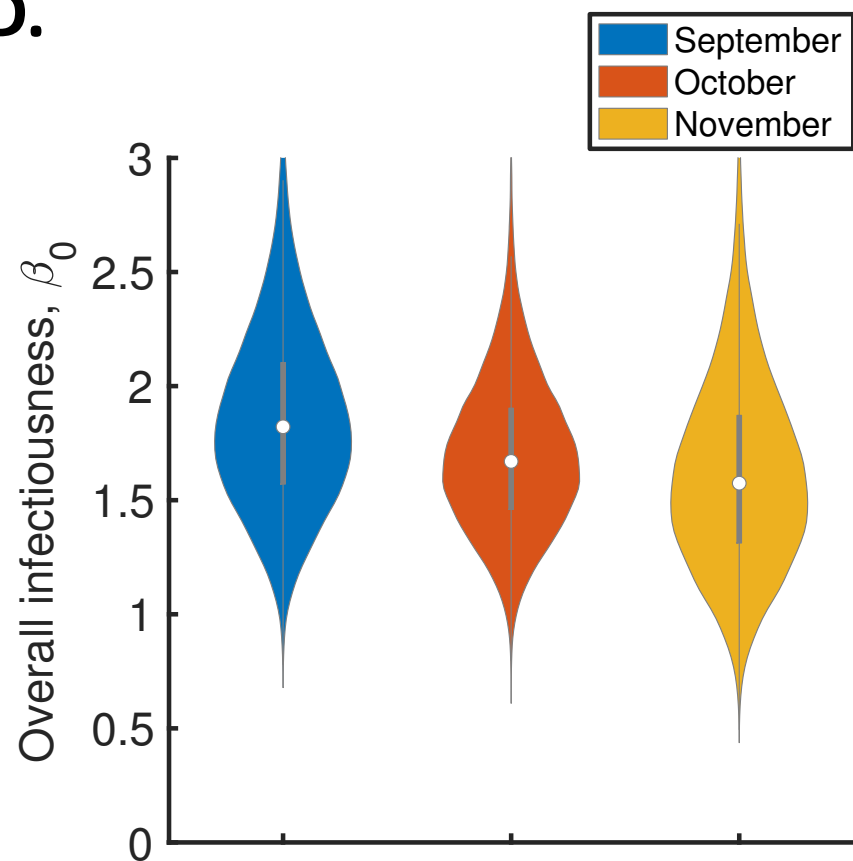

Supplement: supp [file elife-70767-supp-v1.zip]

**A.**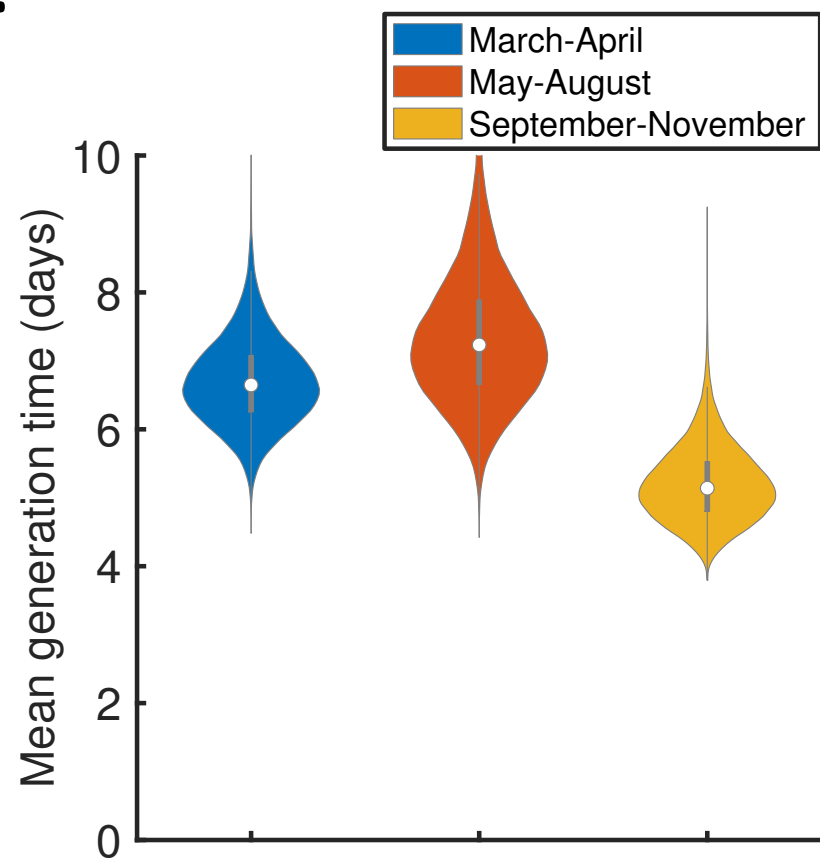**B.**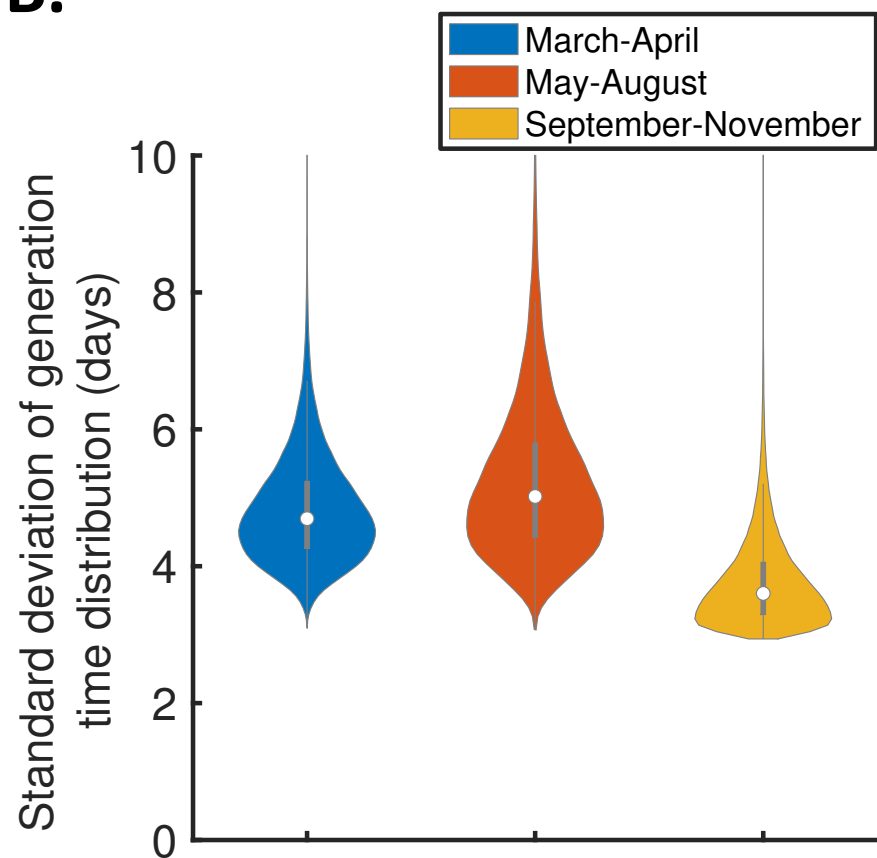**C.**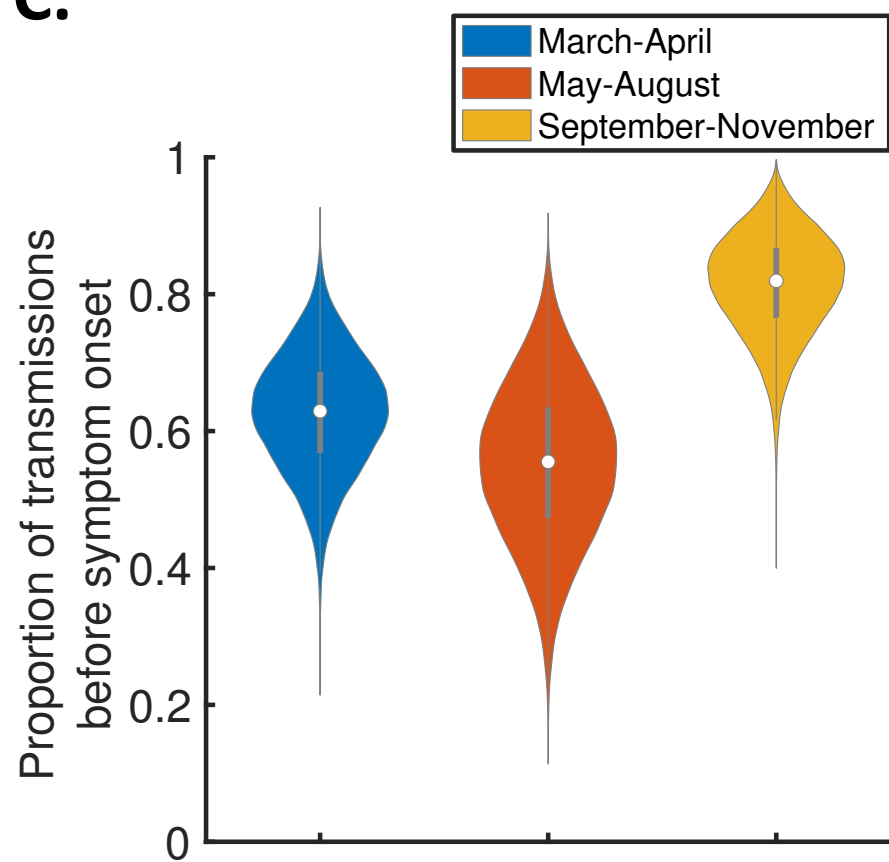**D.**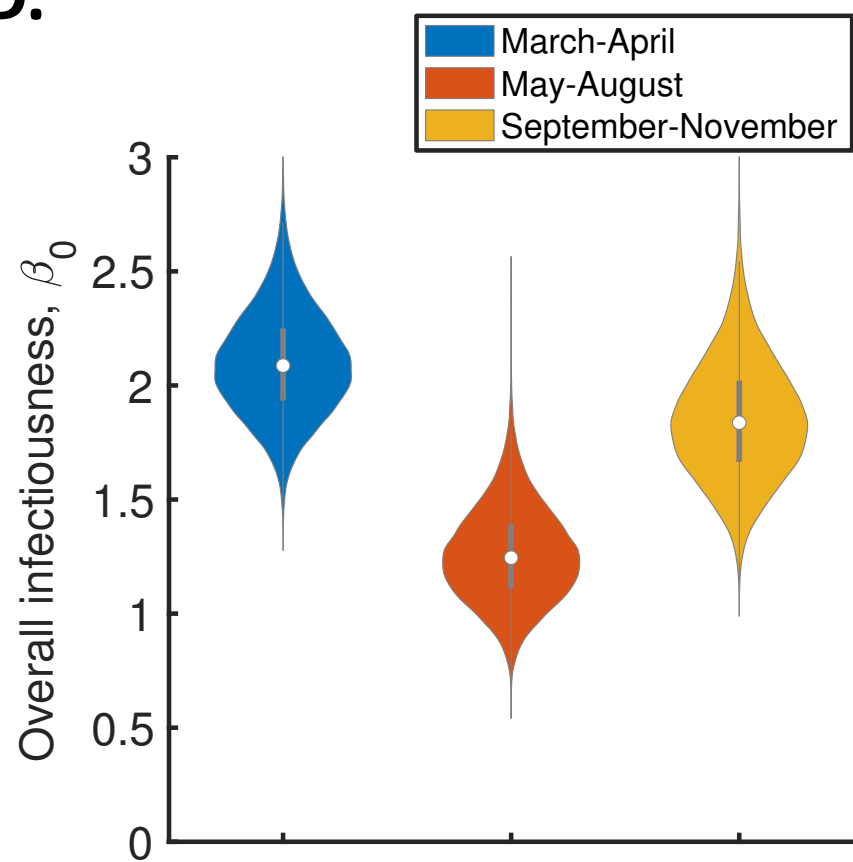

Supplement: supp [file elife-70767-supp-v1.zip]

**A.**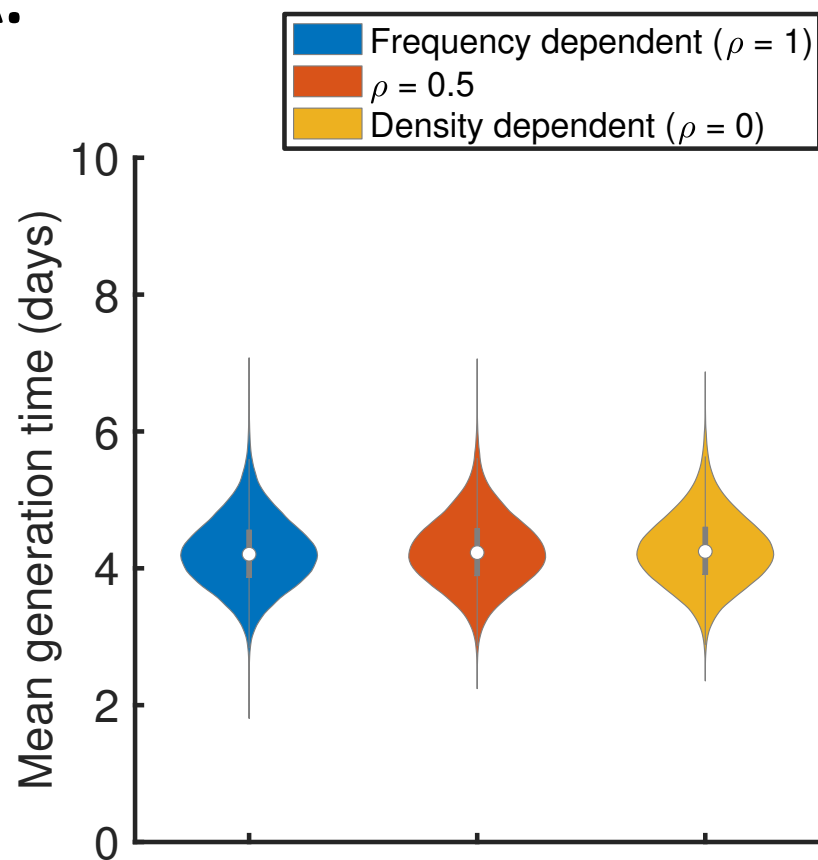**B.**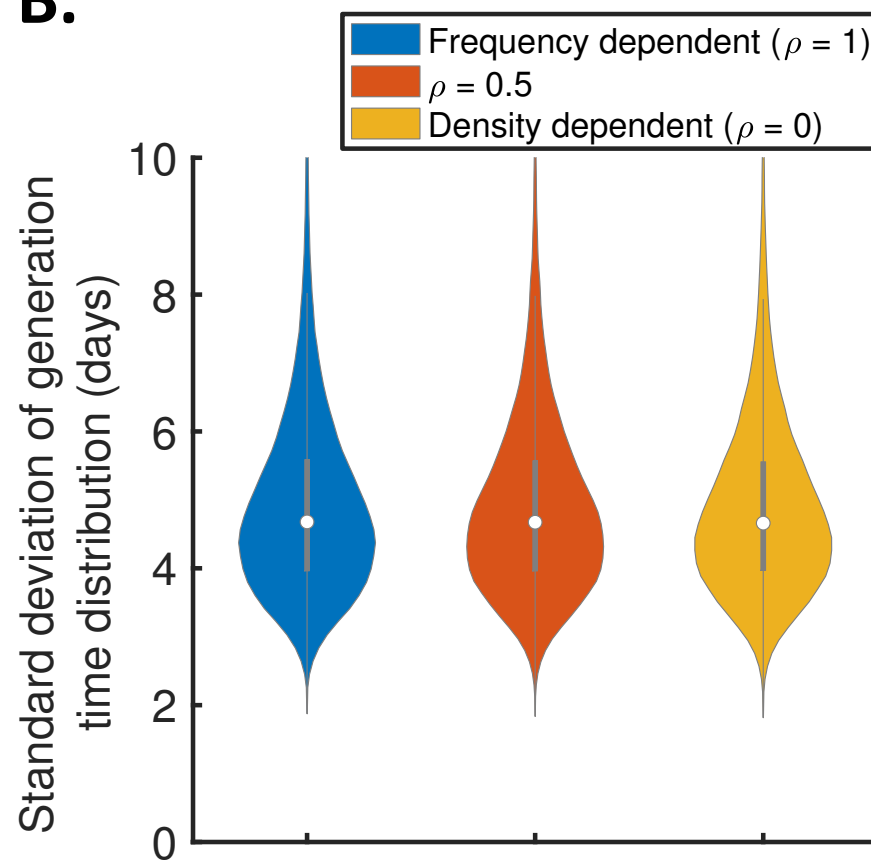**C.**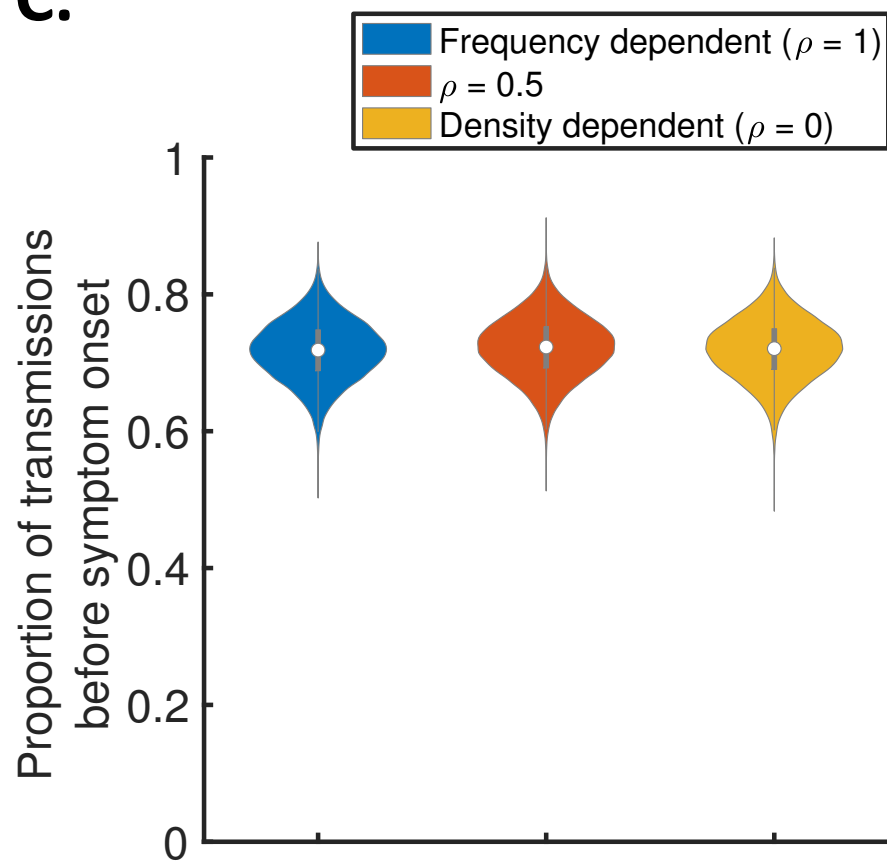**D.**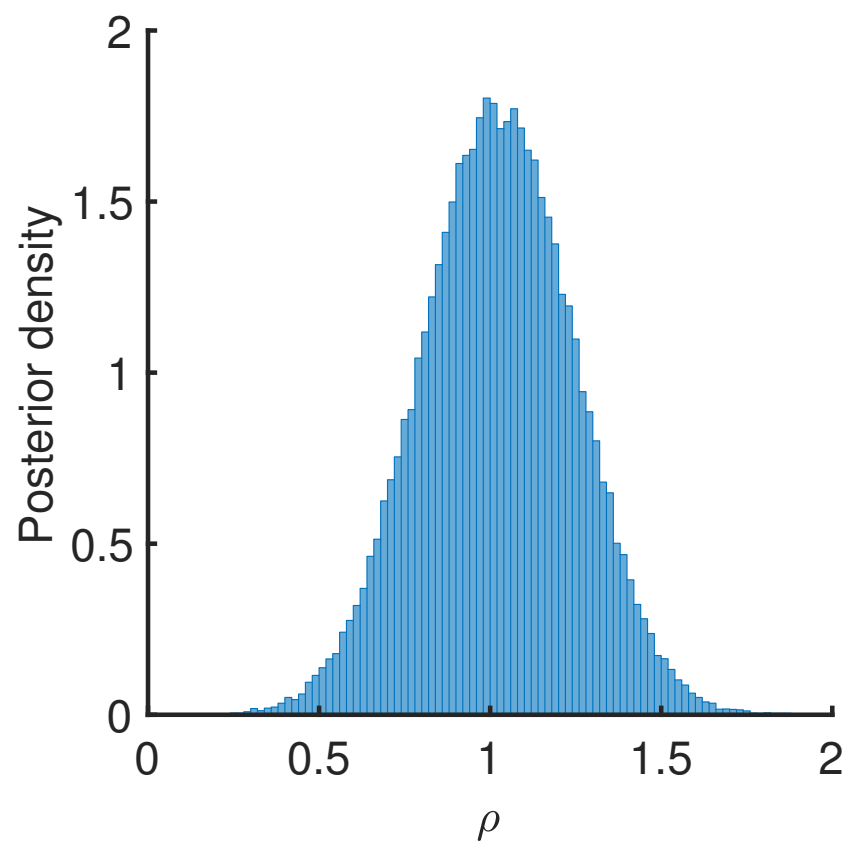

Supplement: supp [file elife-70767-supp-v1.zip]

**A.**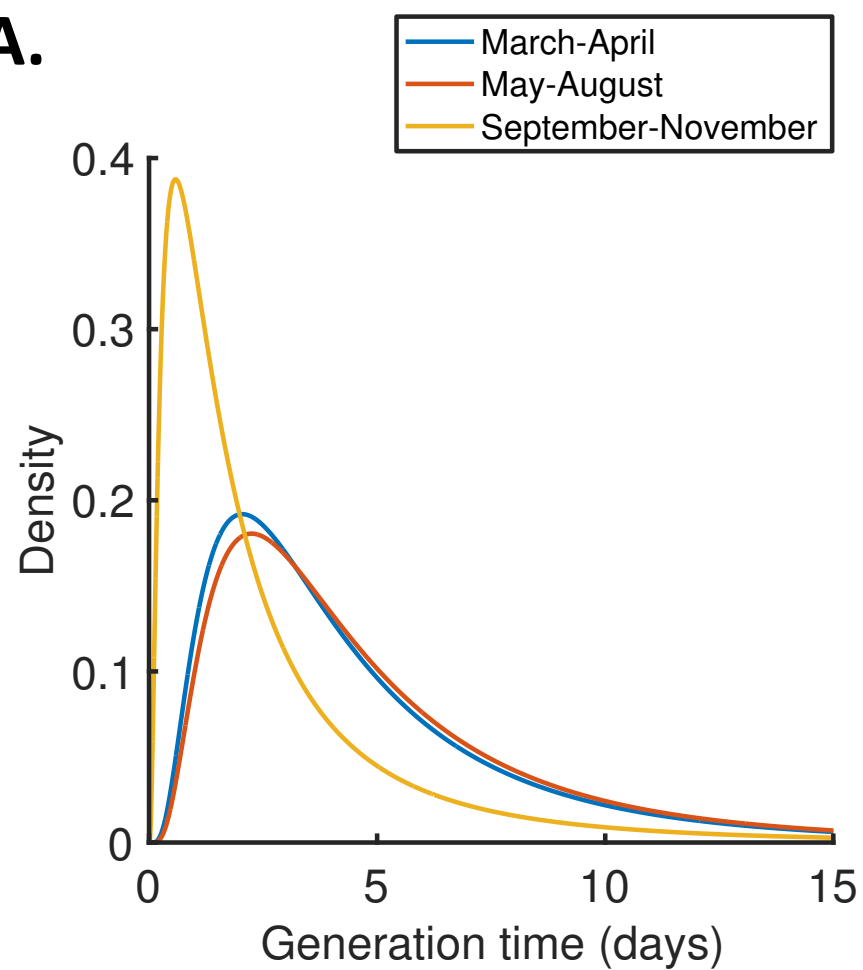**B.**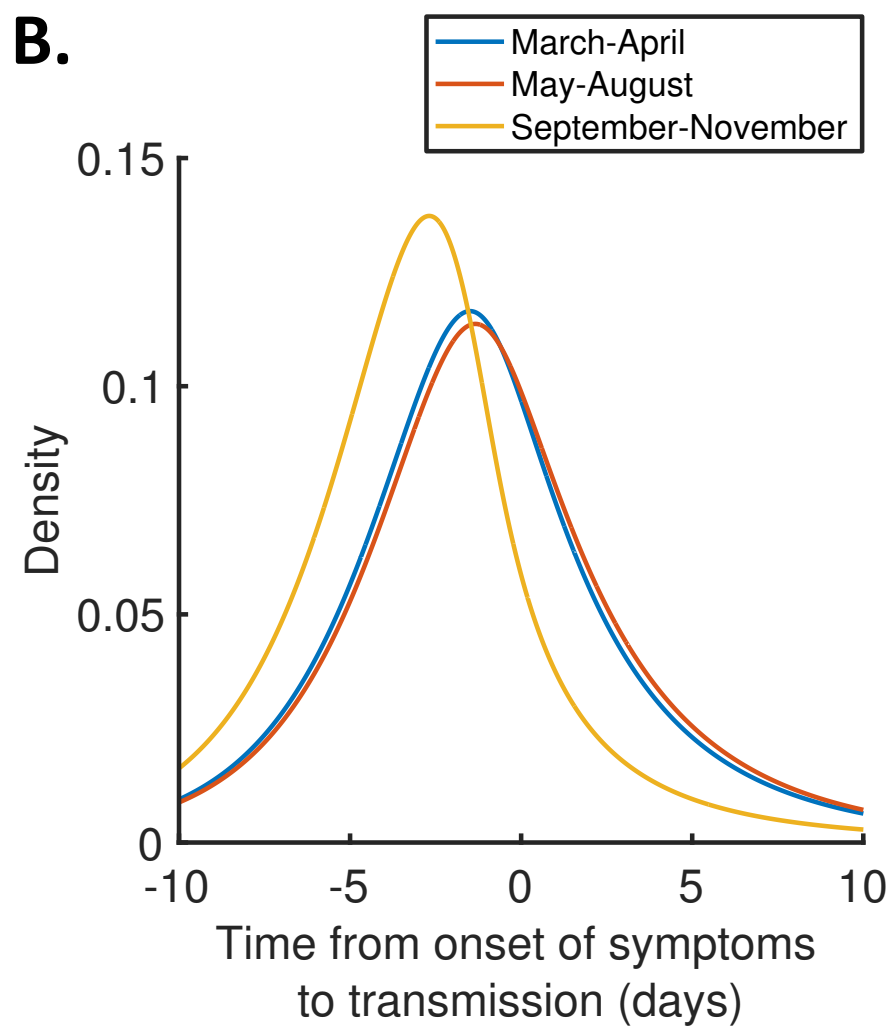**C.**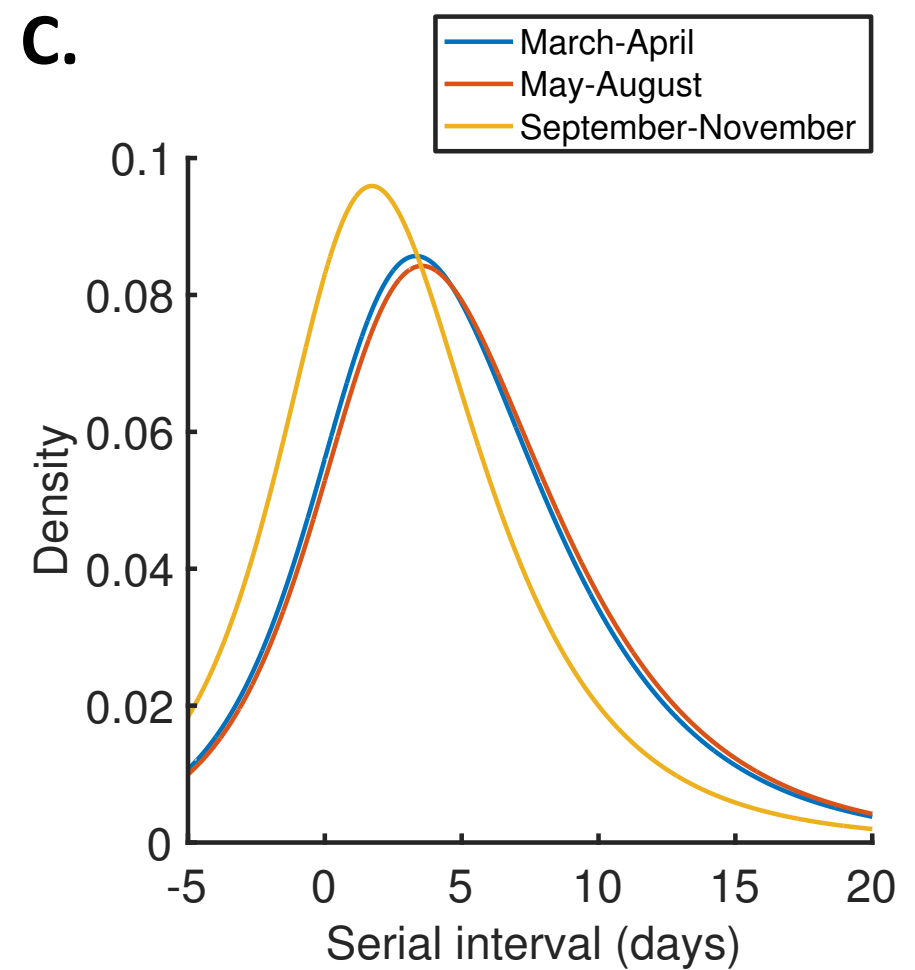**D.**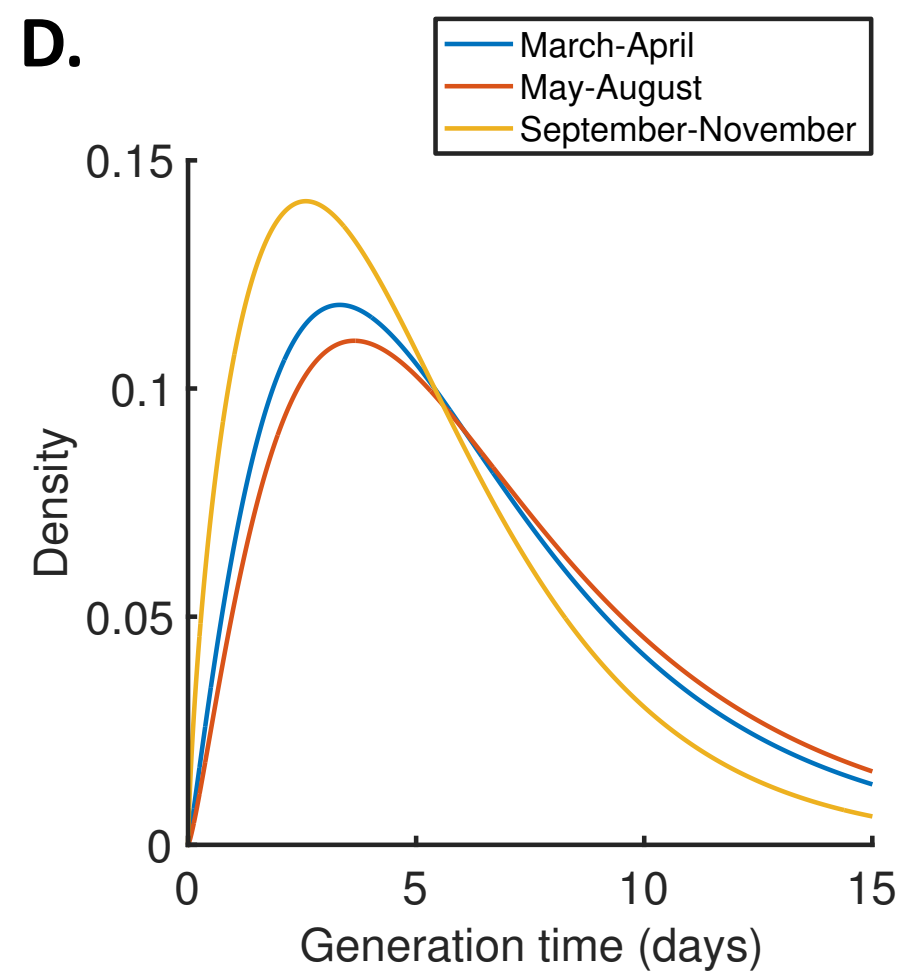**E.**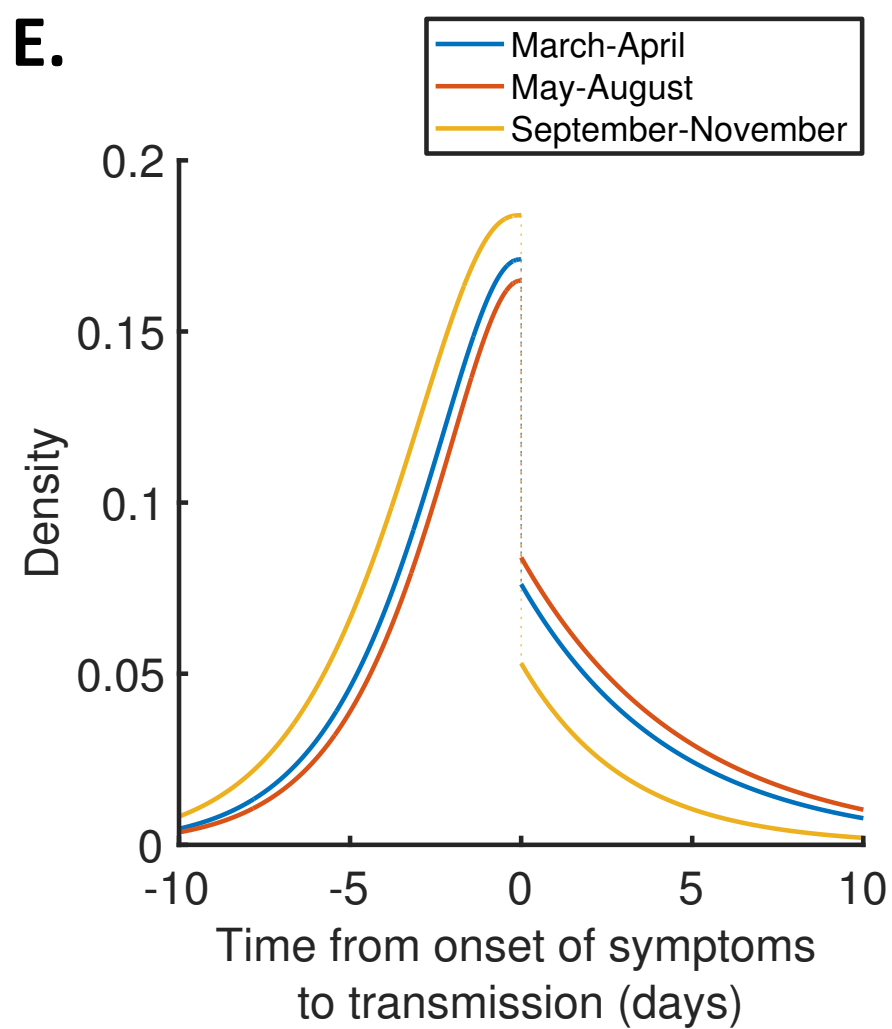**F.**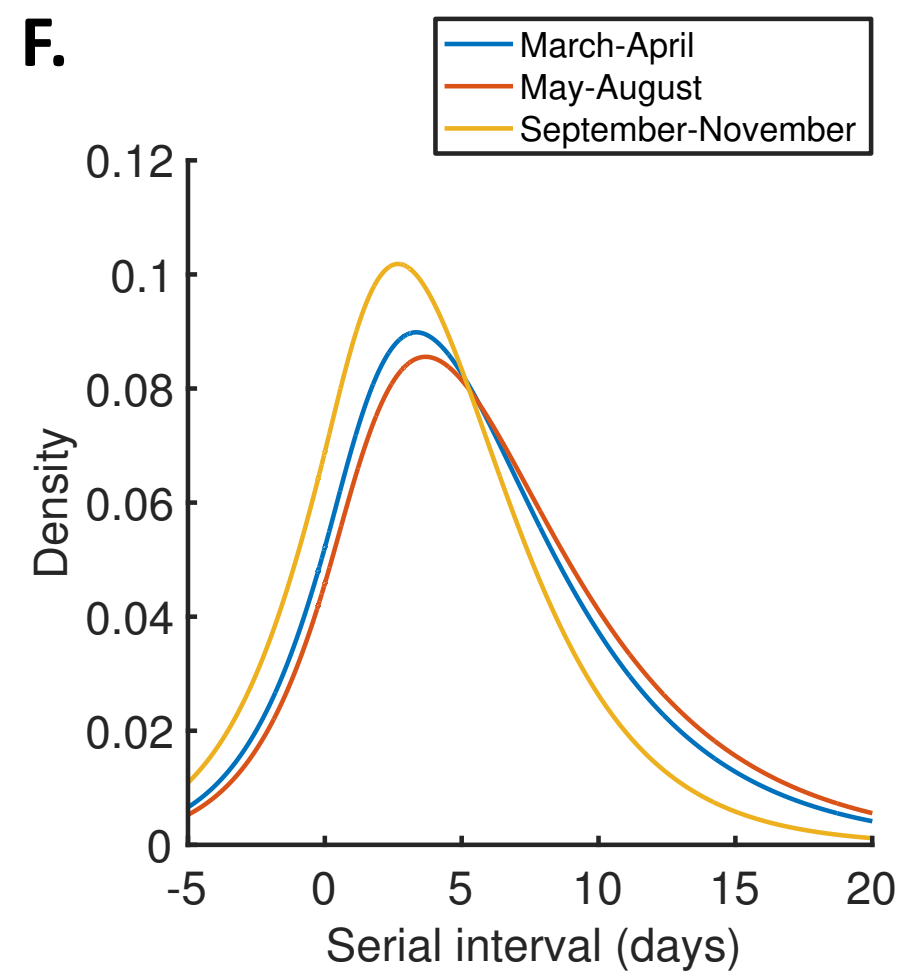

Supplement: supp [file elife-70767-supp-v1.zip]

**A.**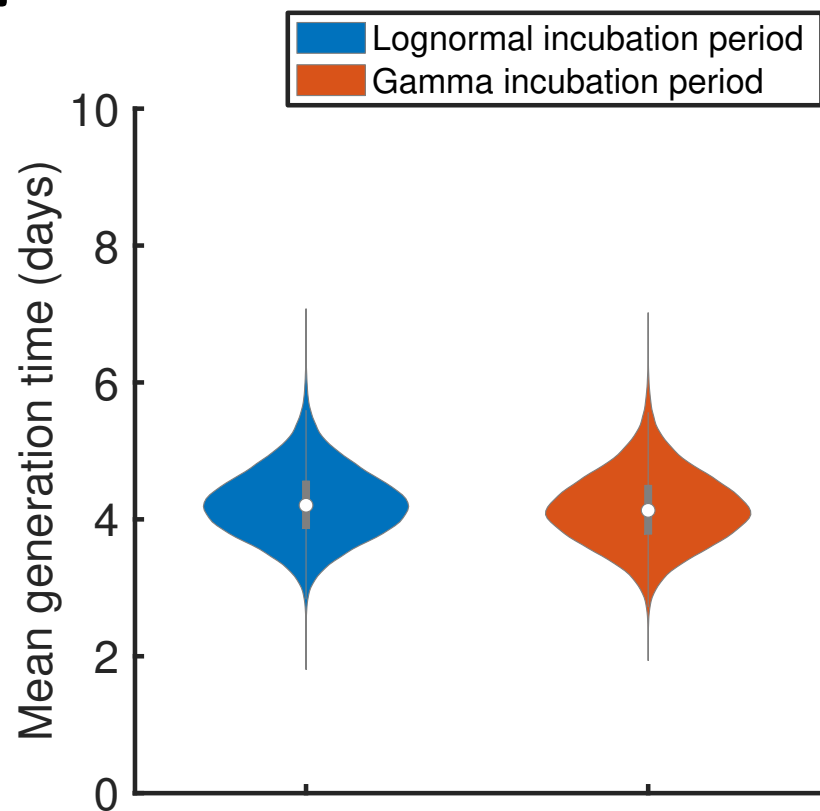**B.**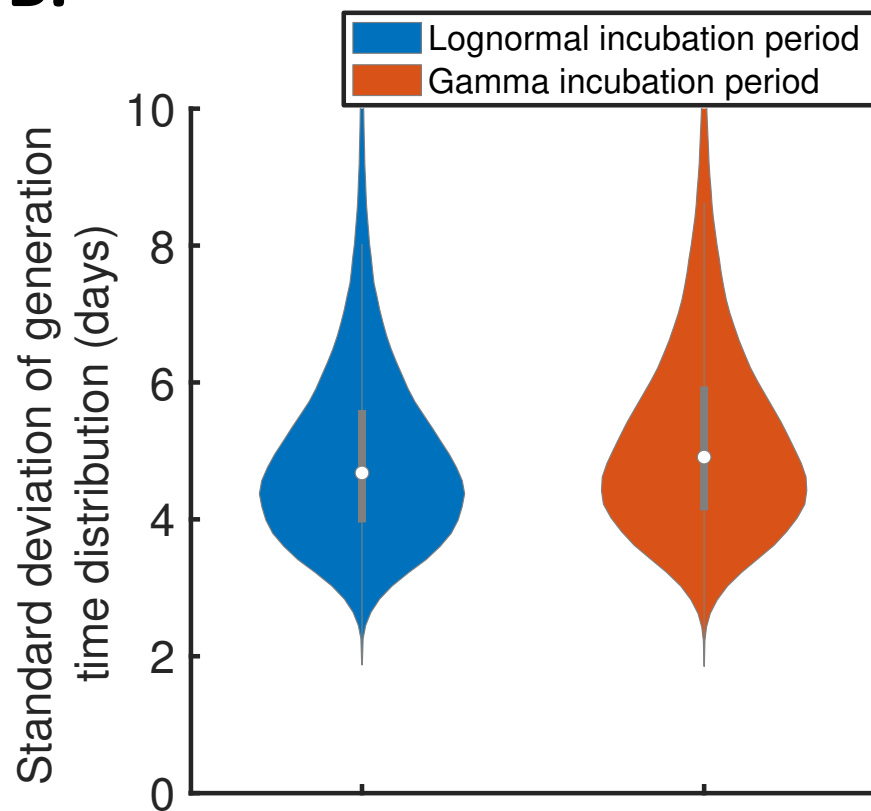**C.**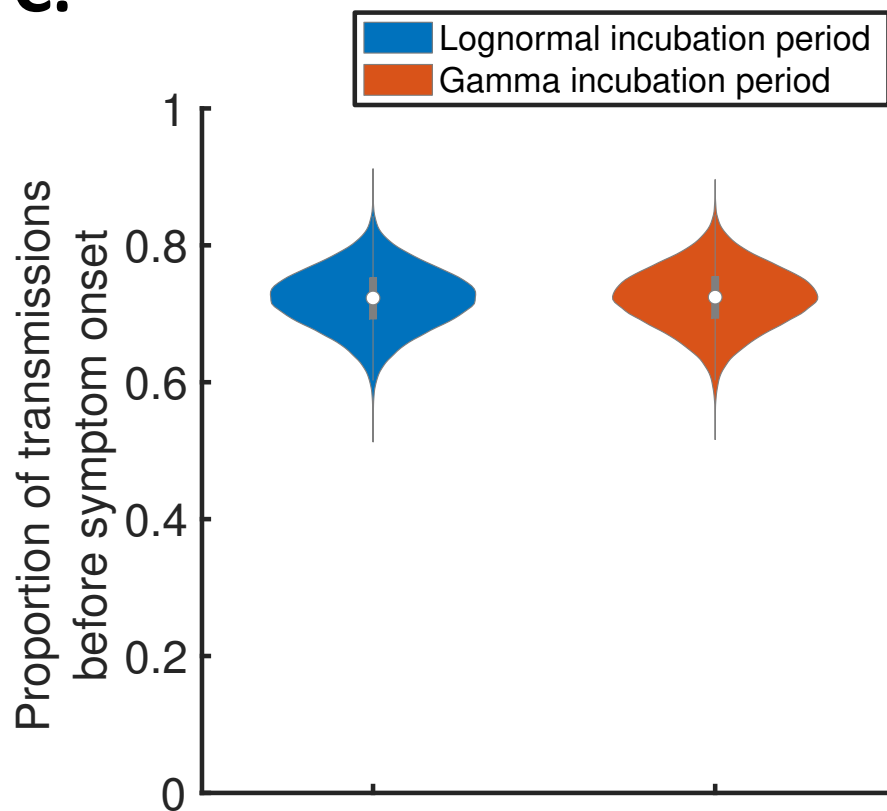**D.**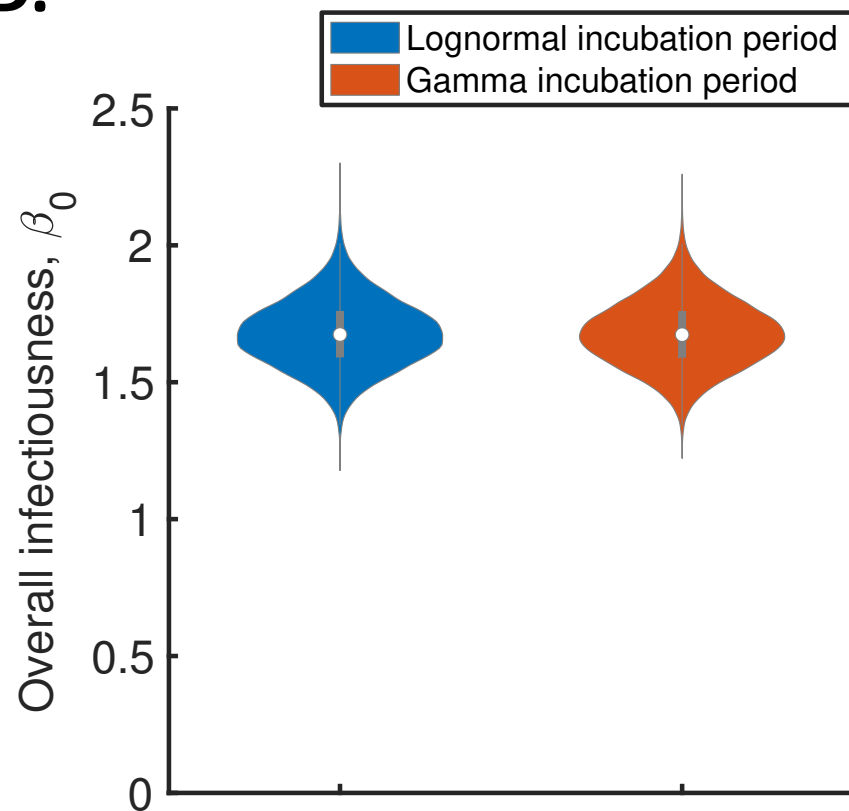

Supplement: supp [file elife-70767-supp-v1.zip]

**A.**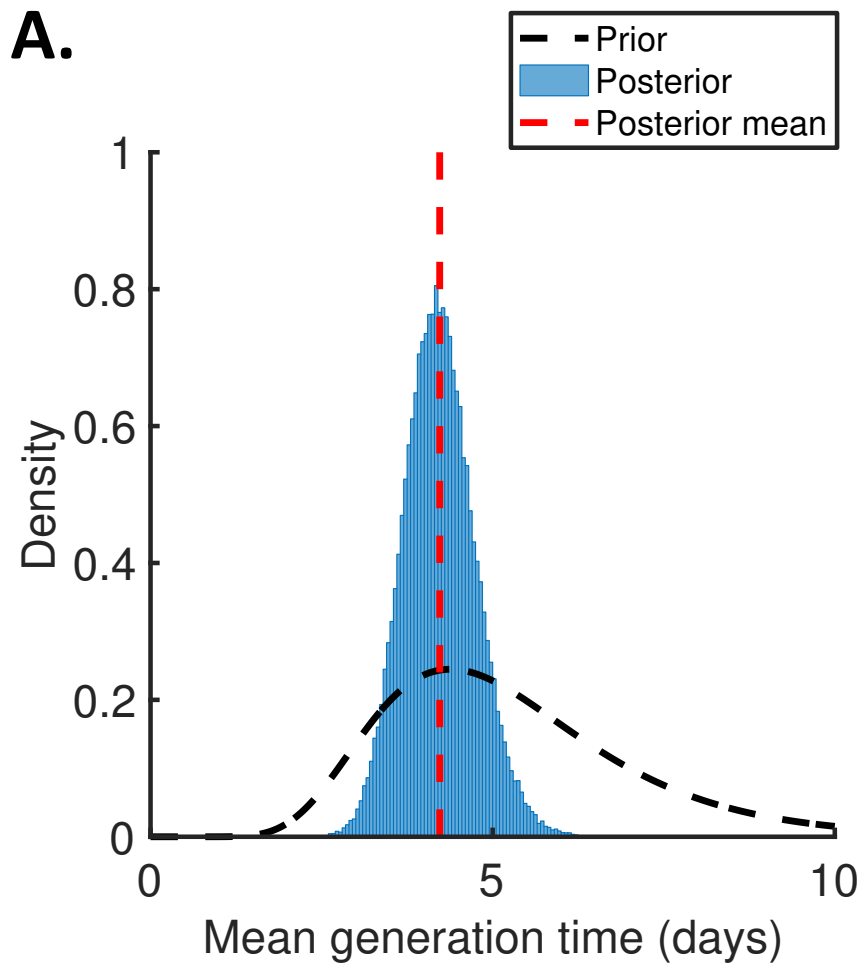**B.**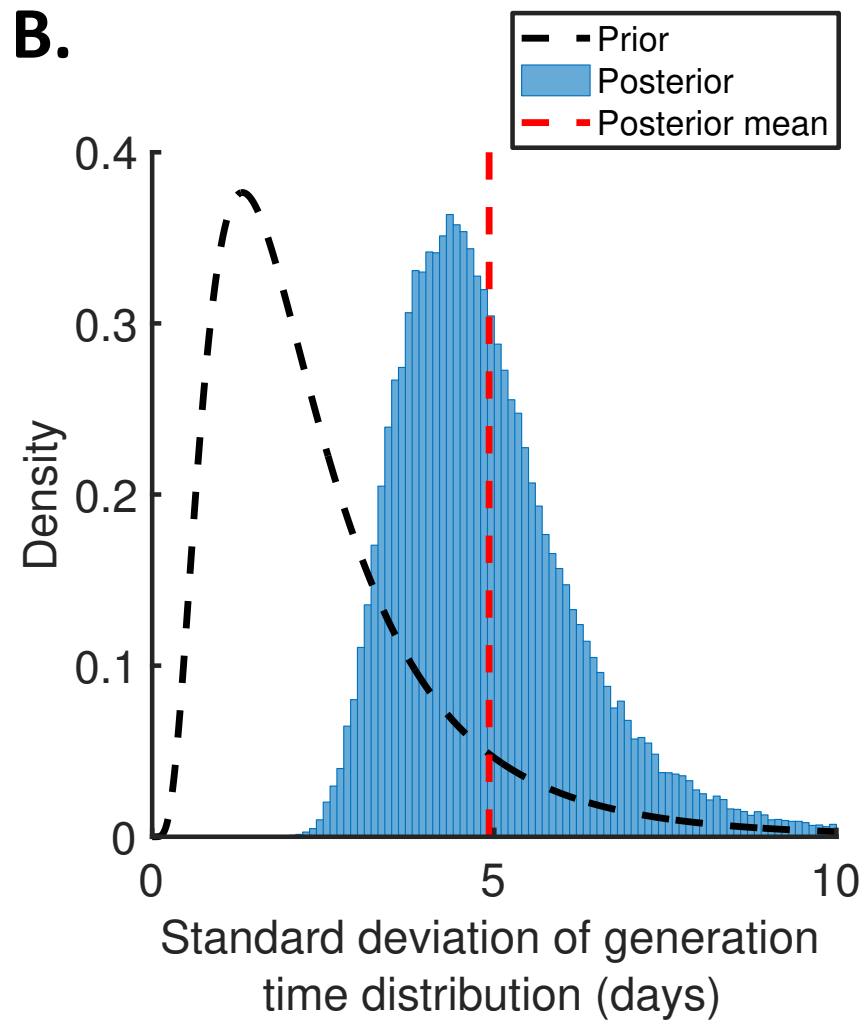**C.**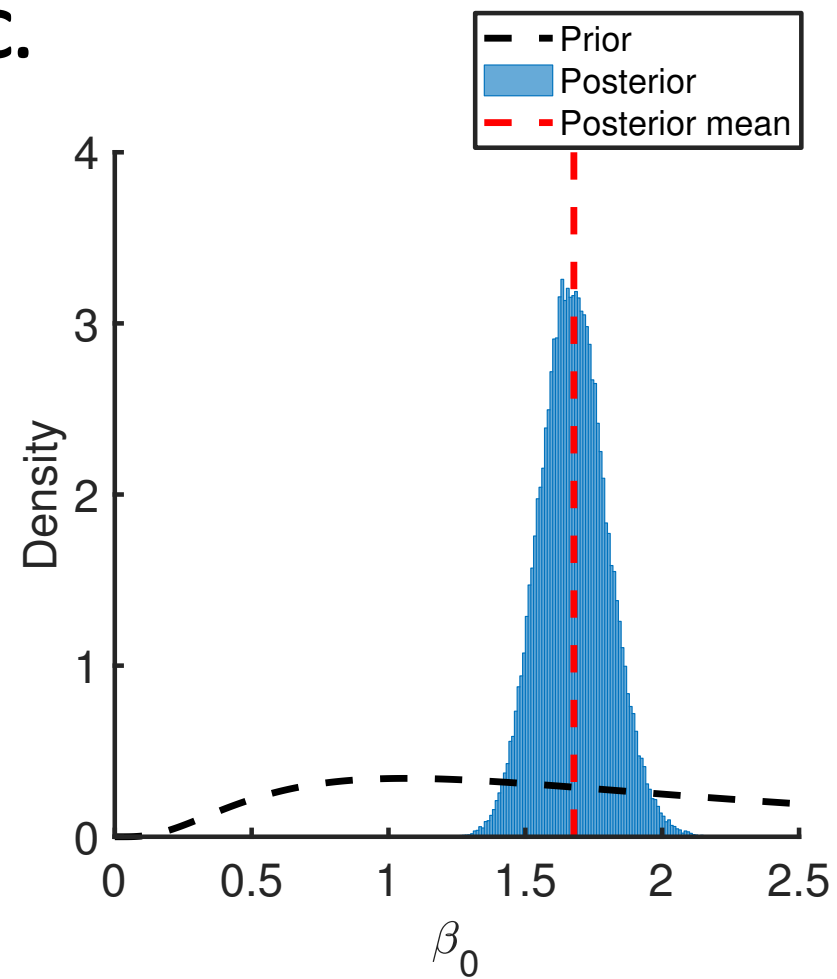

Supplement: supp [file elife-70767-supp-v1.zip]

**A.**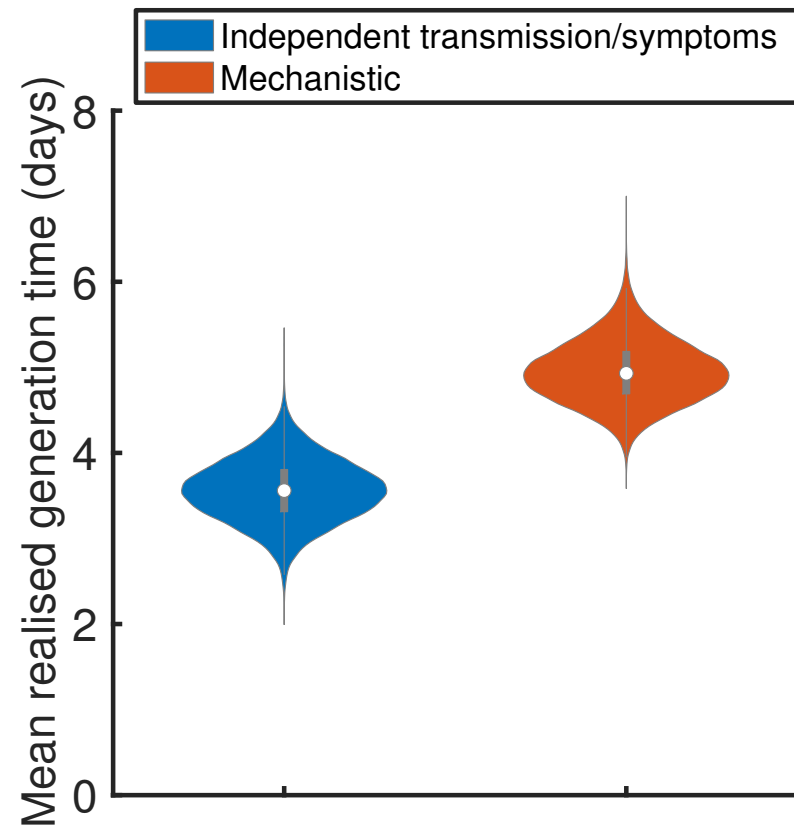**B.**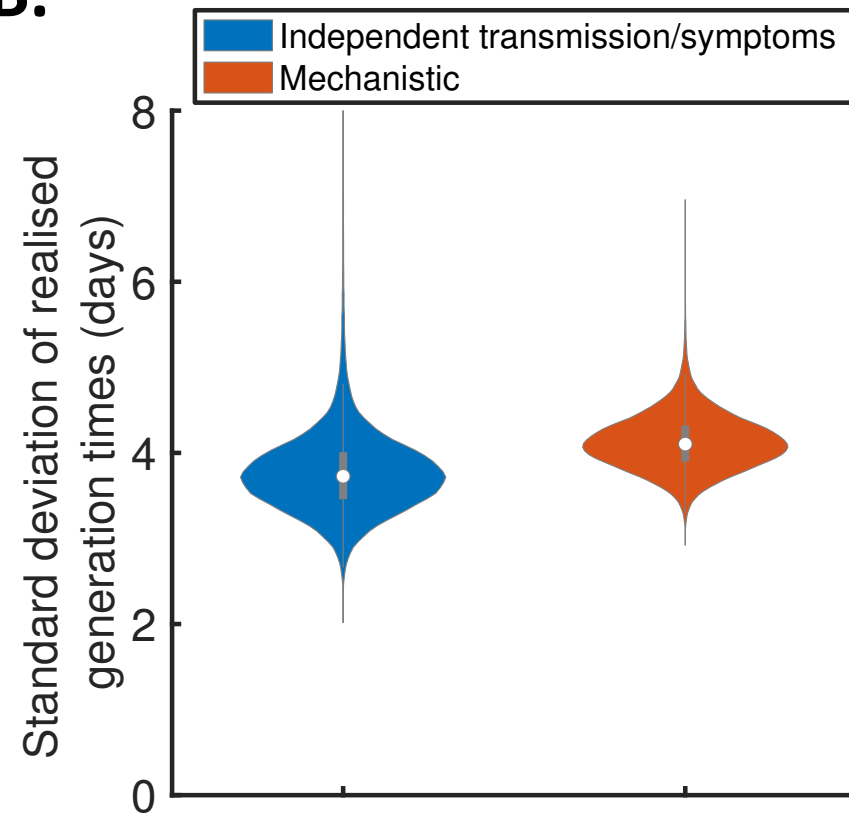**C.**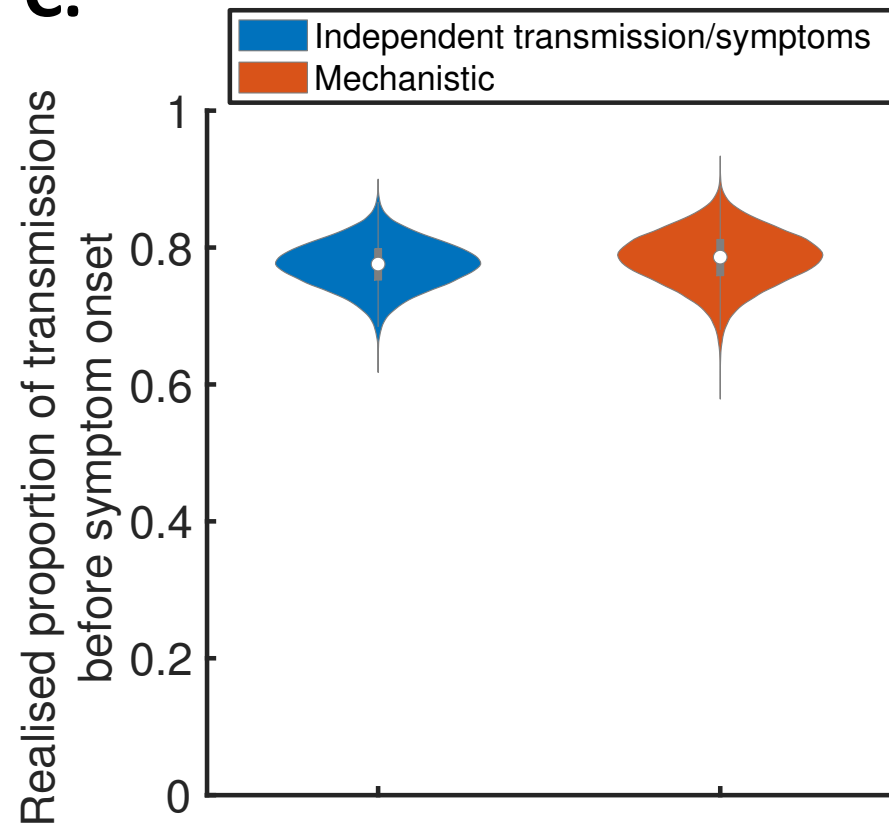

Supplement: supp [file elife-70767-supp-v1.zip]

**A.**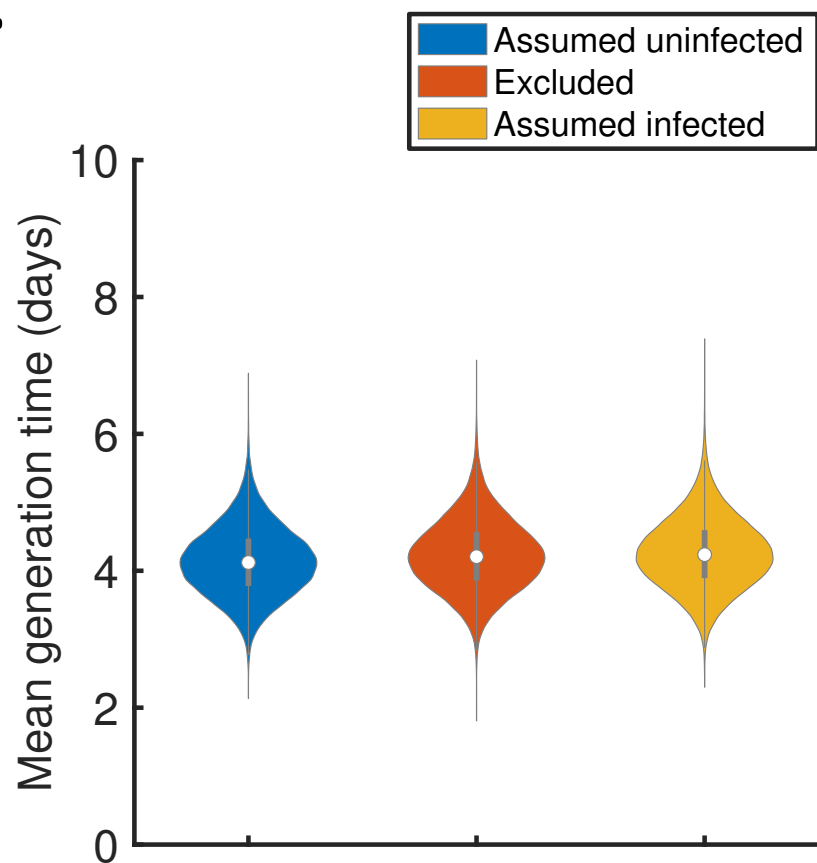**B.**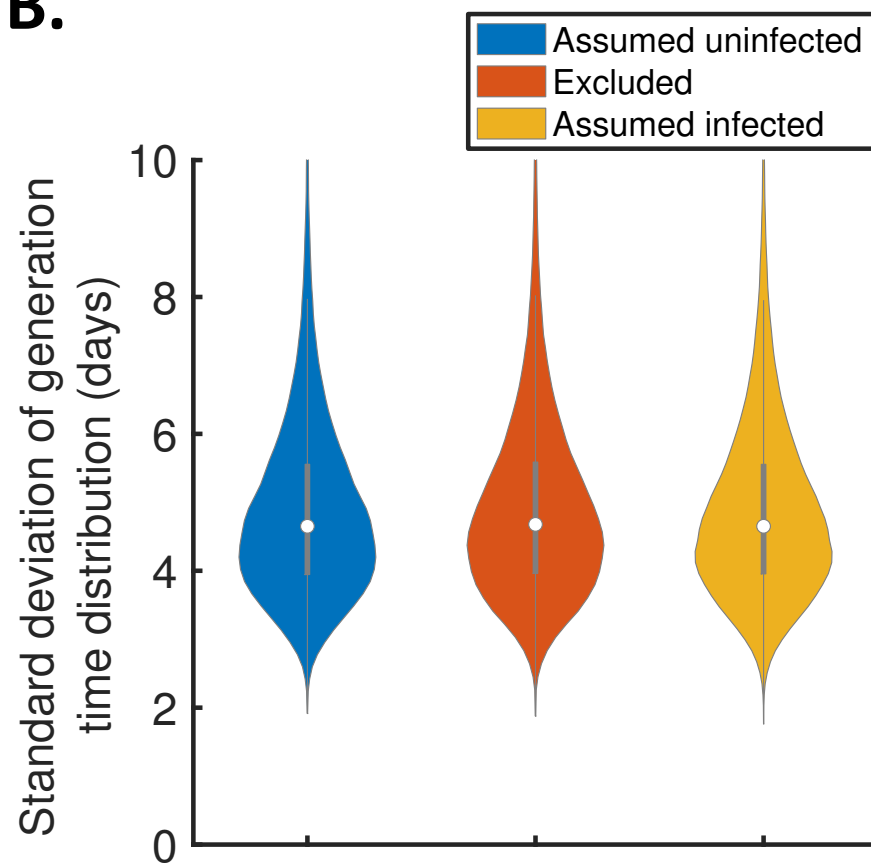**C.**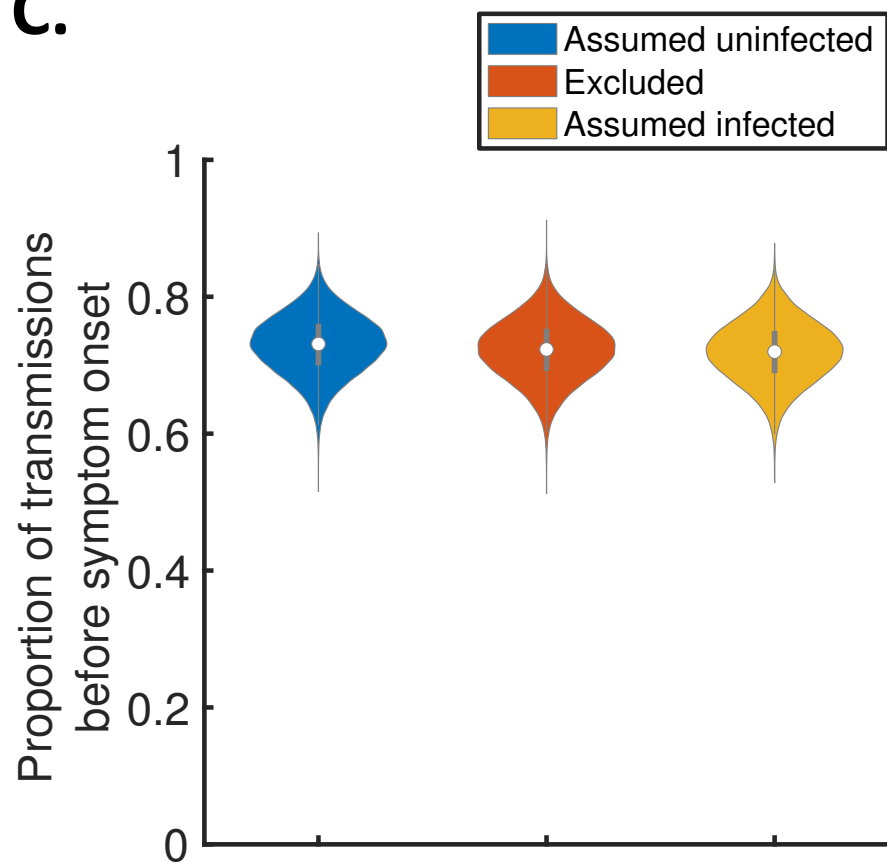**D.**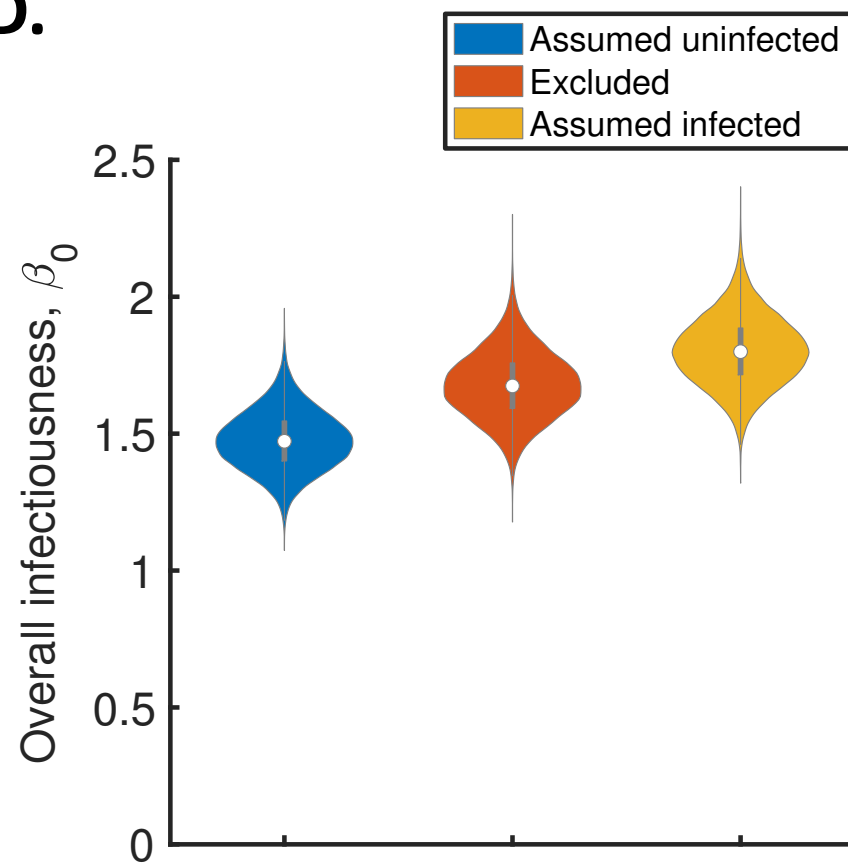

Supplement: supp [file elife-70767-supp-v1.zip]

**A.**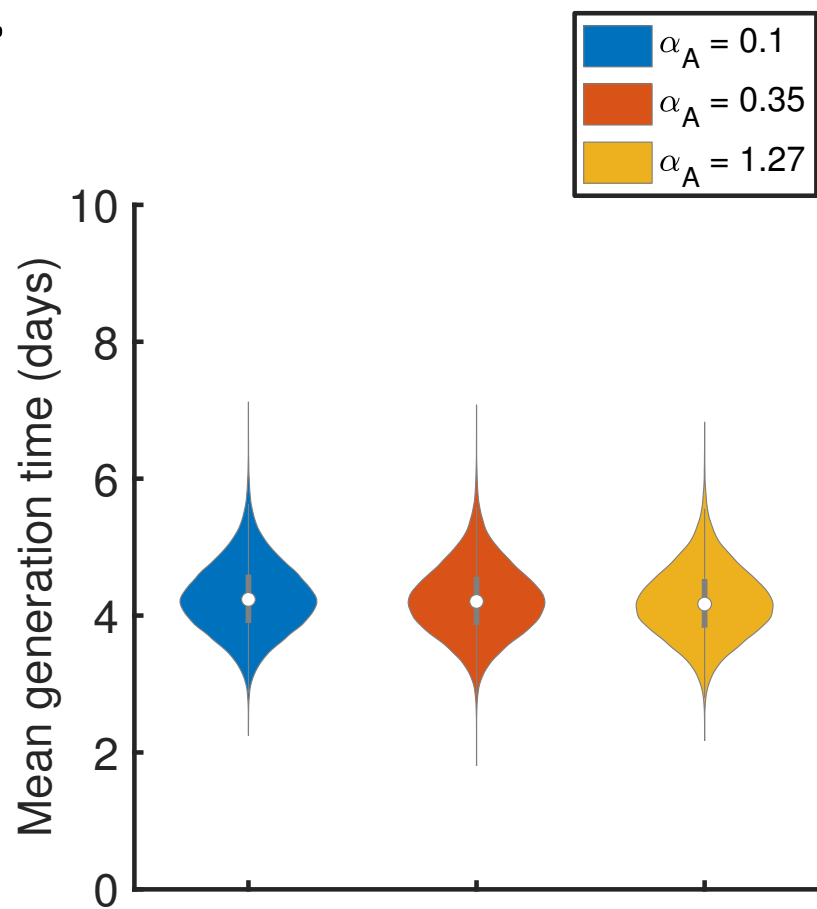**B.**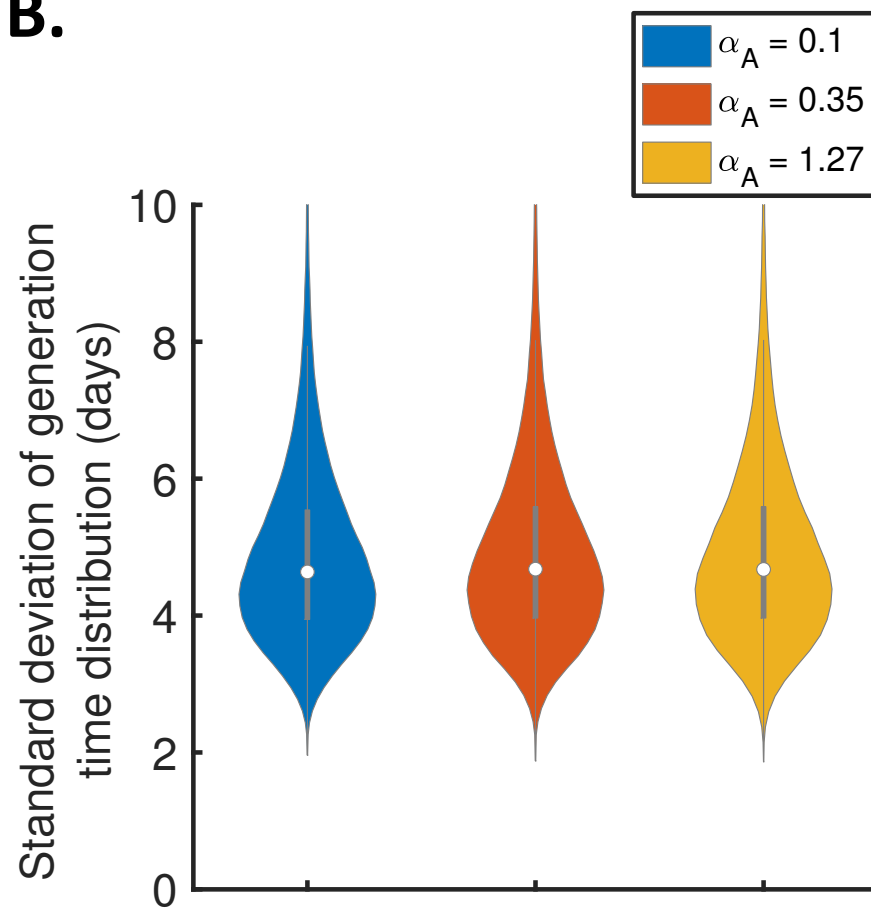**C.**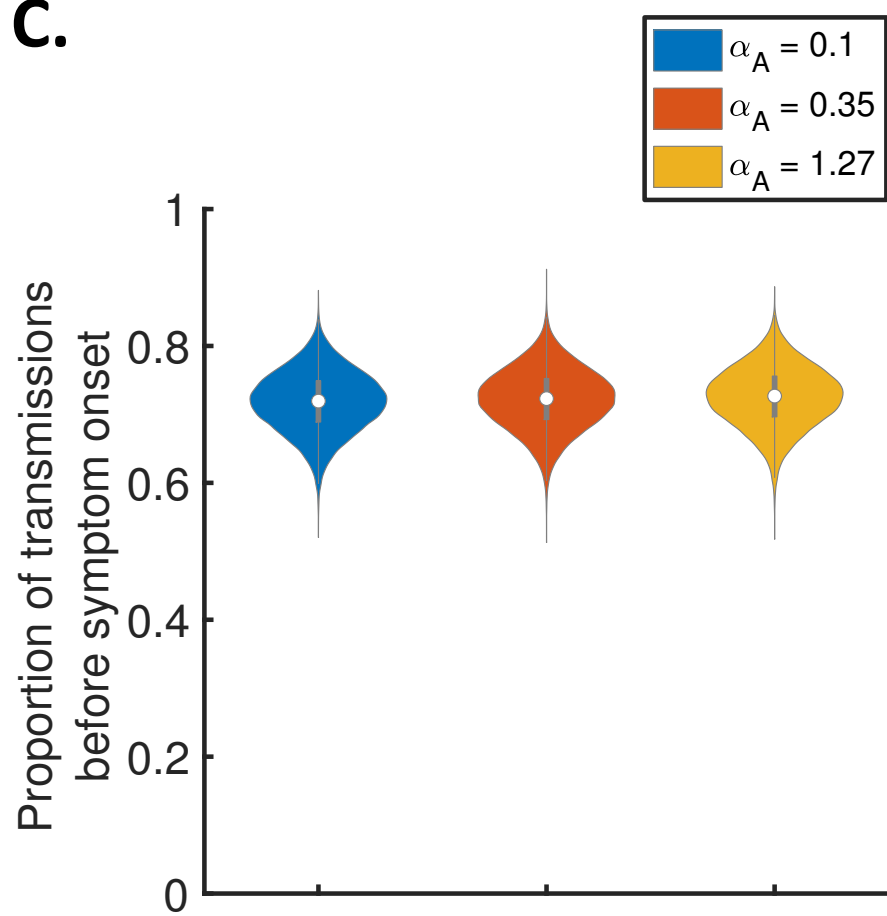**D.**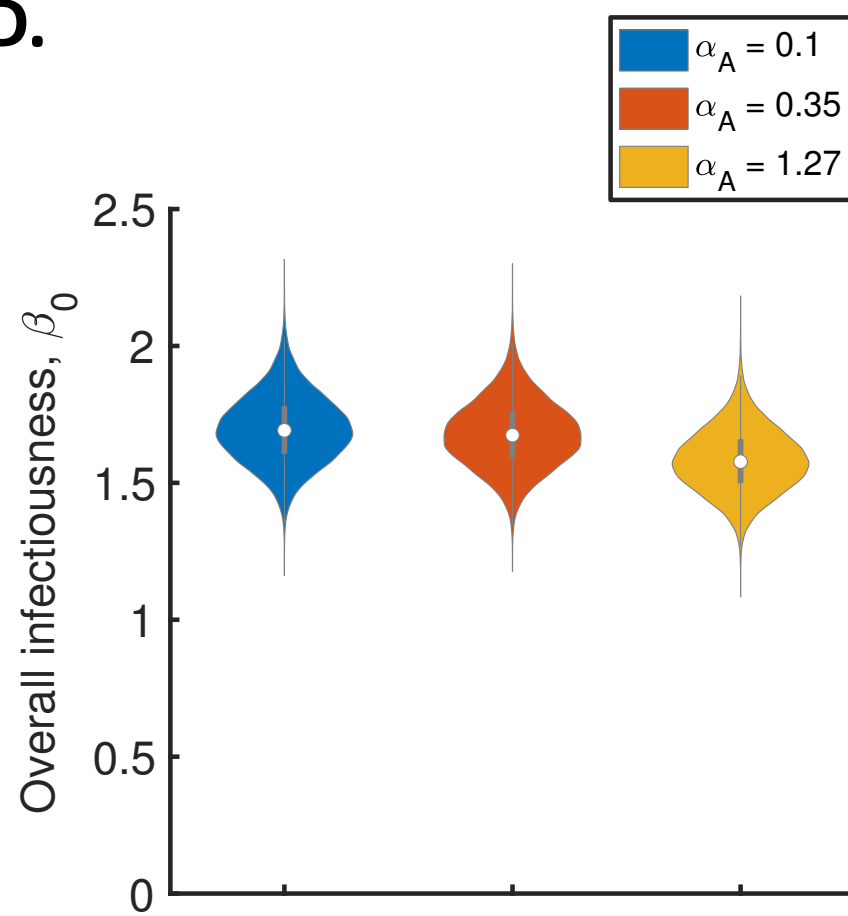

Supplement: supp [file elife-70767-supp-v1.zip]

**A.**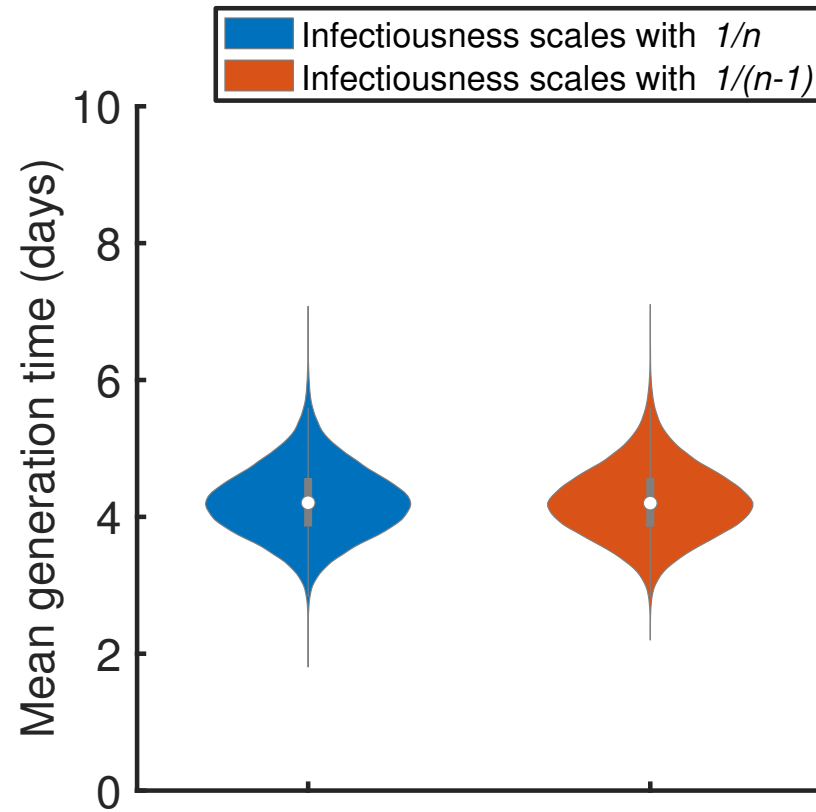**B.**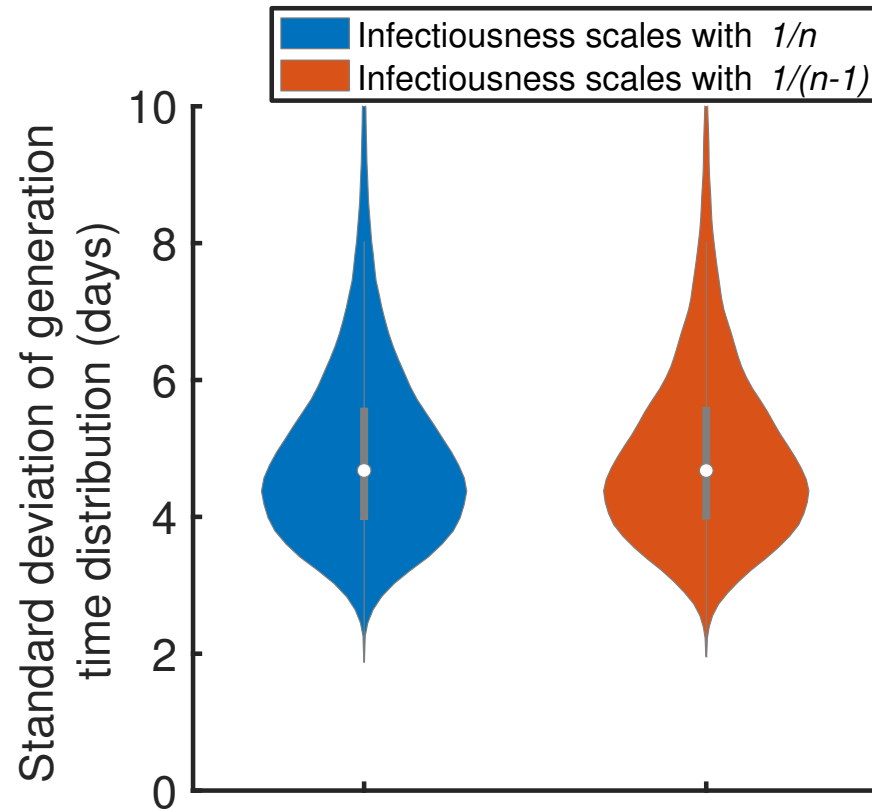**C.**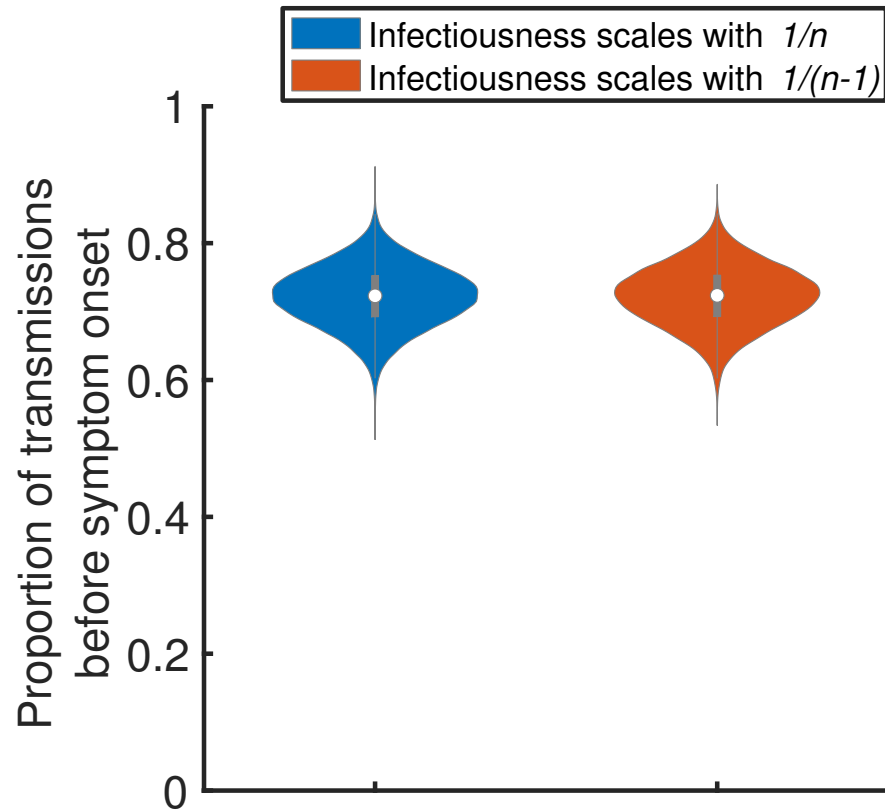

Supplement: supp [file elife-70767-supp-v1.zip]
